# Supplementary material for: Atlas of RNA editing events affecting protein expression in aged and Alzheimer’s disease human brain tissue
Source: PubMed Central journal article supplement (PMC8640037; doi:10.1038/s41467-021-27204-9), 2021-12-02
Supplement: 41467_2021_27204_MOESM1_ESM.pdf [file 41467_2021_27204_MOESM1_ESM.pdf]

## SUPPLEMENTARY MATERIALS

### CONTENTS OF SUPPLEMENTARY MATERIAL:

- 1
- 2
- 3 Supplementary Data (excel sheet): Association results of those non-A-to-I editing events.
- 4 Fig. S1. Distributions of different types of RNA editing events across datasets.
- 5 Fig. S2. Tissue specificity of the known RNA editing events.
- 6 Fig. S3. Volcano plots of comparisons between different regions within each study.
- 7 Fig. S4. Differential expressions of *ADARs* across Alzheimer's disease (AD) status in ROSMAP
- 8 unpaired 635 DLPFC samples.
- 9 Fig. S5. QQ plot of stage II meta-analyzed results and regional and forest plots at top loci.
- 10 Fig. S6. Distribution of frequent RNA recoding events across all datasets and their associations
- 11 with AD status compared to the non-coding events.
- 12 Fig. S7. Functions of the principal components derived from the top AD associated editing
- 13 events on the expressions of genes, isoforms and proteins.
- 14 Fig. S8. Mass-spectrometry figure of edited peptide (frequency  $\geq 50\%$ ) hits in ROSMAP TMT
- 15 proteomic dataset.
- 16 Table S1. Characteristic of the cohorts and picard metrics of RNA-seq datasets.
- 17 Table S2. The recoding RNA editing events with proteomic peptide hits.
- 18 Table S3. Regional differences in gene expressions of *ADARs*.
- 19 Table S4. Top RNA editing events associated with AD status.
- 20 Table S5. Association of *ORAI2* editing event (chr7:102096952, hg19) on multiple traits in
- 21 ROSMAP unpaired DLPFC dataset (N=635).
- 22 Table S6. Comparisons between AD genes and non-AD genes.
- 23

24 Fig. S1. Distributions of different types of RNA editing events across datasets. Each dataset is  
 25 presented as one stacked bar and different colors represent different types of editing events. On  
 26 average, the majority of RNA editing events are the canonical A-to-I editing types, which are  
 27 shown as the A-to-G and T-to-C editing types ( $\geq 90\%$ ) and the C-to-T and G-to-A types (5%).

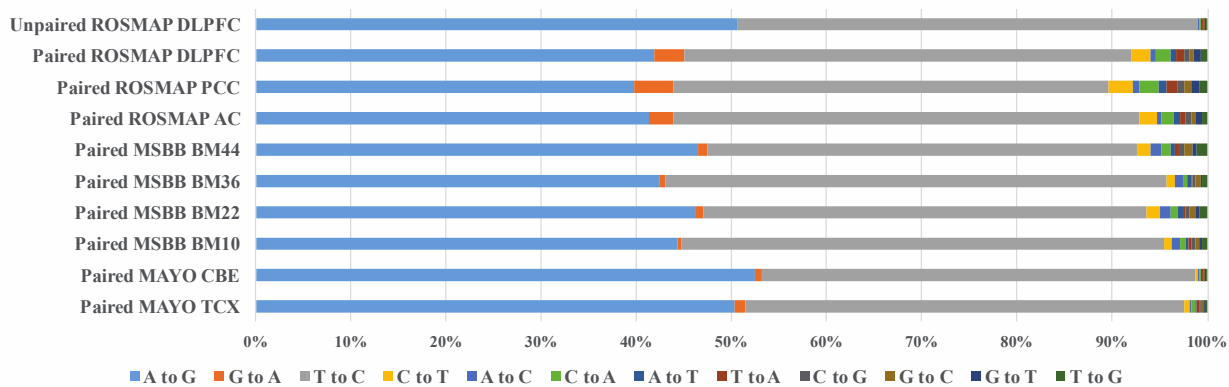

28

29

30

31 Fig. S2. Tissue specificity of the known RNA editing events. Pie chart showed the percentage of  
32 the known RNA editing events across different tissue types.

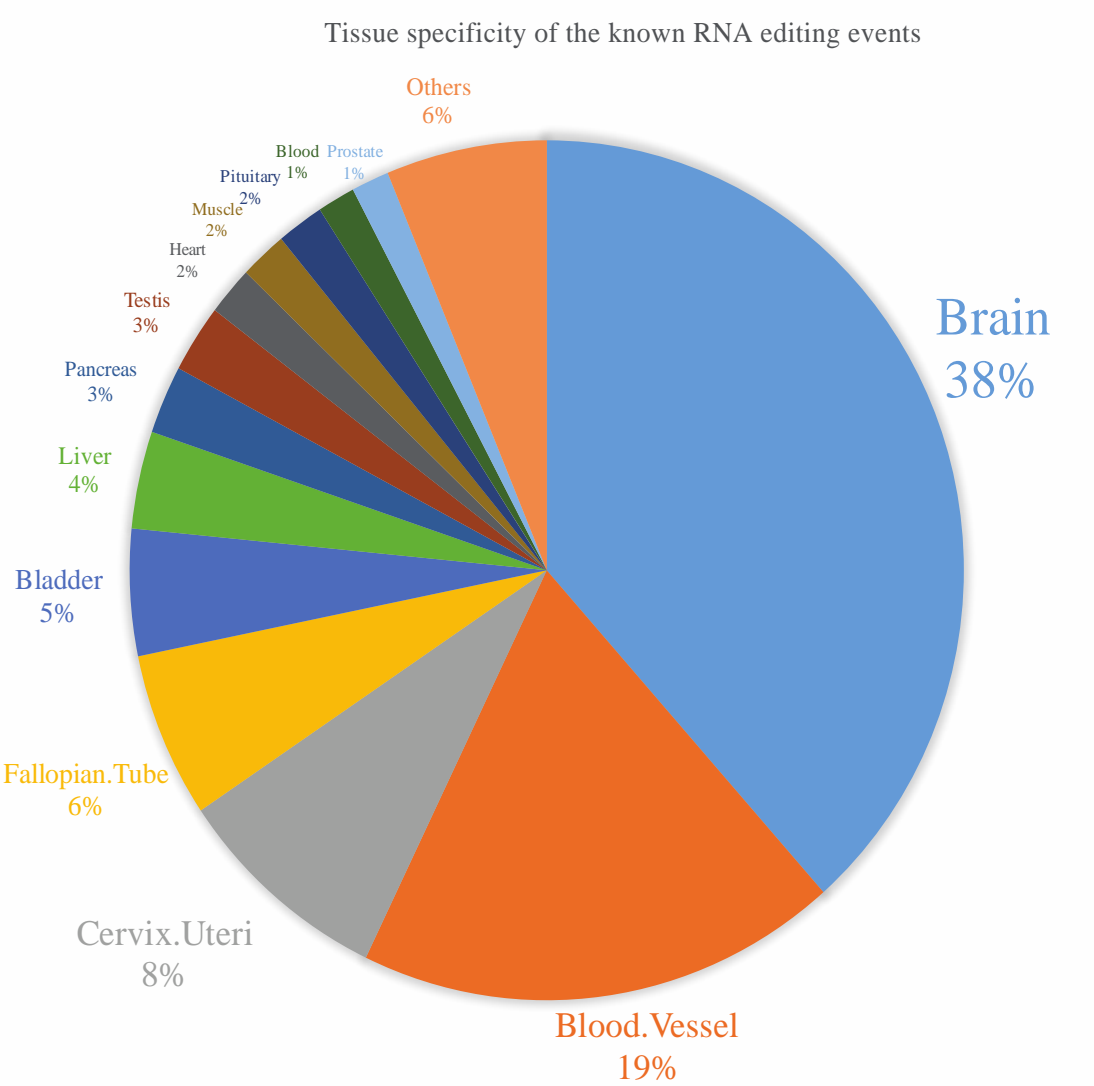

33

34

35 Fig. S3. Volcano plots of comparisons between different regions within each study. Comparisons  
36 of the level (% alternative reads) of each RNA editing event between 2 brain regions within each  
37 study were presented in a volcano plot. Each dot is one RNA editing event present in both brain  
38 regions. X and Y axes display the regression coefficient and its corresponding  $-\log_{10}$   
39 transformed  $P$  value of the exposure variable of 2 brain regions in the general linear mixed  
40 model which used subject as random effect, RNA editing level of each RNA editing event as  
41 dependent variable and its covariates include age at death, sex, postmortem interval (PMI), and  
42 RIN score using R lme package. The red horizontal line showed the Bonferroni-corrected  $P$   
43 value threshold of  $1.49 \times 10^{-6}$  ( $0.05/33,641$ ). The red dots with annotated gene names are those  
44 RNA editing event with  $P \leq 1.49 \times 10^{-6}$  and regression coefficient of the differences between 2  
45 brain regions  $\geq 30\%$ . X and Y axes display the regression coefficient and its corresponding -  
46  $\log_{10}$  transformed  $P$  value from the mixed linear regression model with the subject as random  
47 effect and fixed covariates of age at death, sex, postmortem interval and RIN score. The  
48 displayed  $P$  values were not adjusted by the multiple testings and were derived by two-sided  
49 tests.

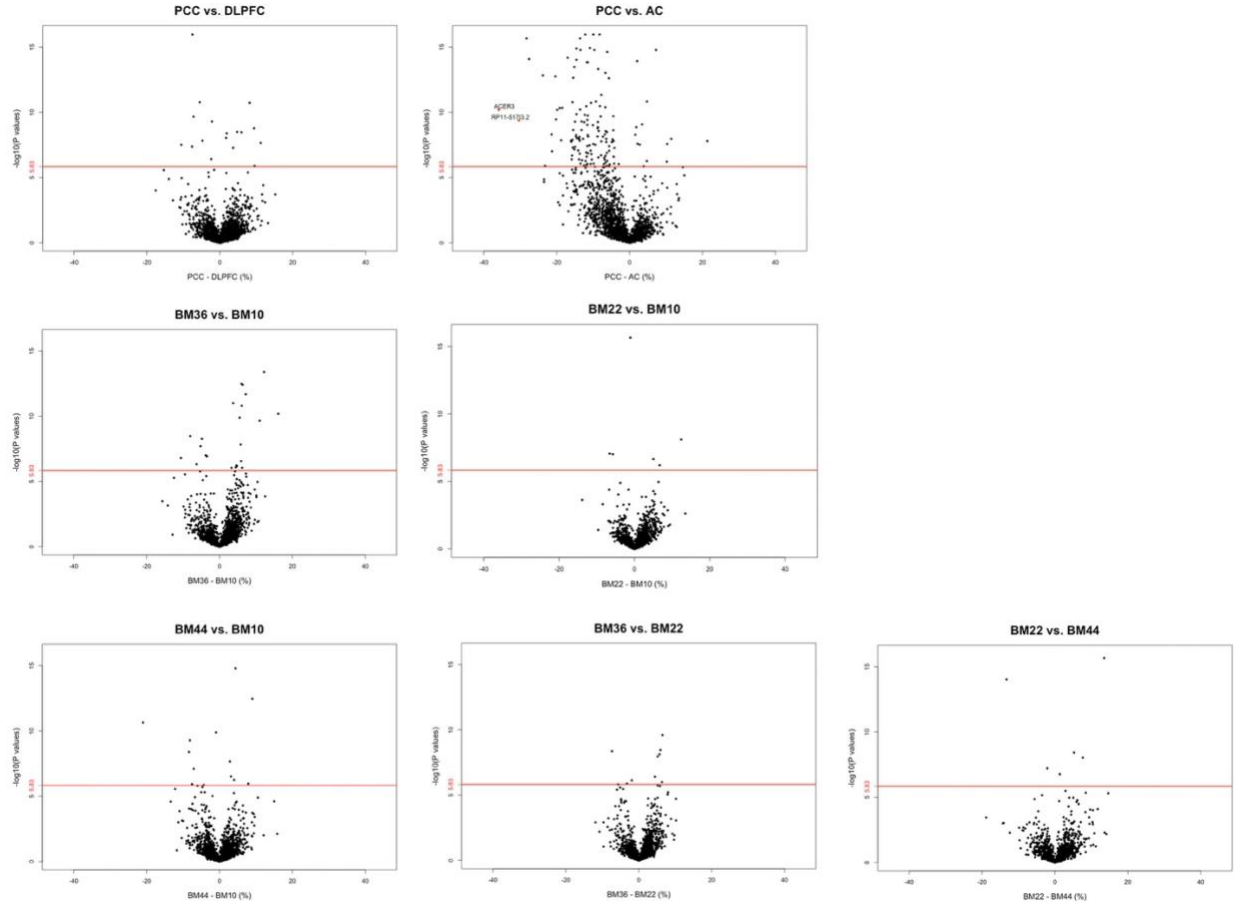

51 Fig. S4. Differential expressions of ADARs across Alzheimer's disease (AD) status in ROSMAP  
52 unpaired 635 DLPFC samples. All the panels in this figure have the same sample size (N=635  
53 subjects). We showed the level of RNA expressions of (a) *ADAR1*, (b) *ADAR2*, (c) *ADAR3* and  
54 (d) the calculated value combining all three types of *ADARs* (*ADAR1+ADAR2-ADAR3*), based  
55 on their previously reported potential functions on RNA editings (*ADAR1* and *ADAR2* increase  
56 while *ADAR3* inhibits RNA editings), in subjects who cognitively non-impaired (NCI, blue),  
57 mildly impaired (MCI, pink), or fulfill criteria for AD dementia (AD, yellow). The RNA  
58 expression of *ADARs* (log<sub>2</sub> transformed FPKM) are displayed by the notched boxplot, in which  
59 the lines from the bottom to the top represents the minimum value or the value <25% percentile,  
60 25% percentile, median, 75% percentile, the maximum value or the value >75% percentile. The  
61 "Notch" around the median represent the 95% confidence interval of the median, and the area  
62 with color represent the interquartile with 50% of values. The open circle represents the potential  
63 outliers. The mean *ADARs* expressions are displayed in the legend box on the right top corner,  
64 in which the P value for the general linear regression model with *ADARs* expression as  
65 dependent variable and 3 AD status as exposure variable. The displayed *P* values were not  
66 adjusted by the multiple testings and were derived by two-sided tests.

a

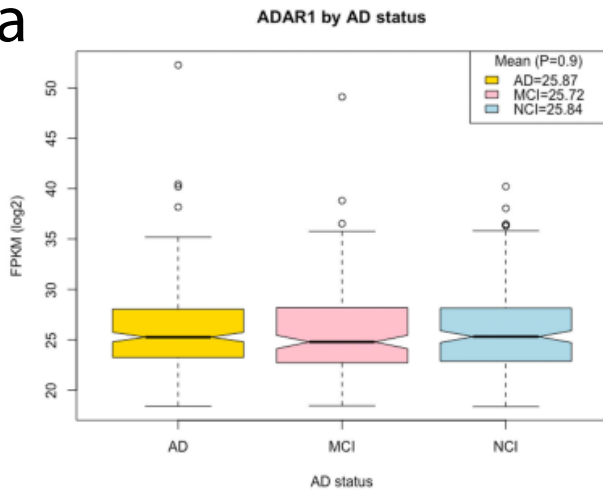

b

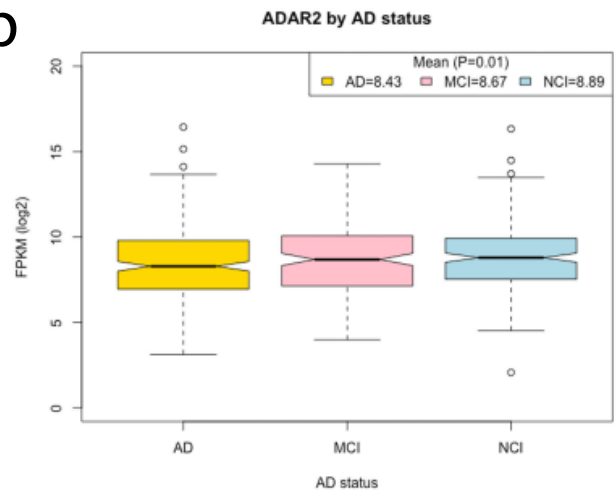

c

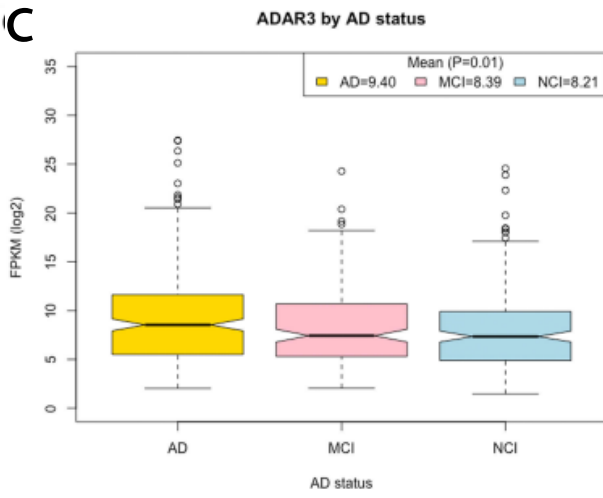

d

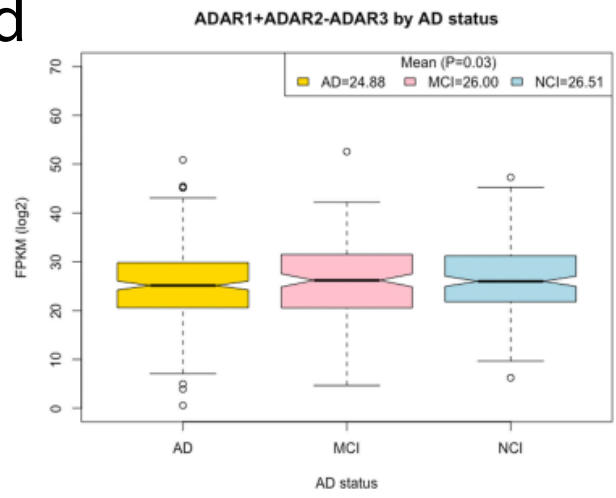

67

68

69 Fig. S5. QQ plot of stage II meta-analyzed results and regional and forest plots at top loci. (a)  
70 QQ plot. (b-e) Regional (upper) and forest (lower) plots of top loci at *SOD2* (b), *MCURI* (c),  
71 *HSDL2* (d) and *PFKP* (e). Regional plot shows the Stage I association results (upper). Each  
72 circle represents a frequent RNA editing event with the top one in purple. The correlation ( $r$ )  
73 between the top one and the others are shown with the color coding of: shallow to dark red for  
74  $0 < r \leq 1$ , white for  $r=0$ , and shallow to dark blue for  $-1 \leq r < 0$ . The correlation matrix between each  
75 pair is shown in a triangle (lower) with the same color coding. Forest plot show results in each  
76 dataset and Stage II meta-analyzed results. The estimated difference in the mean level of RNA  
77 editing (% alternative reads) by clinical AD status (0 for normal controls, 1 for mild cognitive  
78 impairment, and 2 for AD) and its 95% confidence interval were illustrated by the filled square  
79 and horizontal line for each dataset or the filled red diamonds for the summaries. The displayed  
80  $P$  values were not adjusted by the multiple testings and were derived by two-sided tests.



a

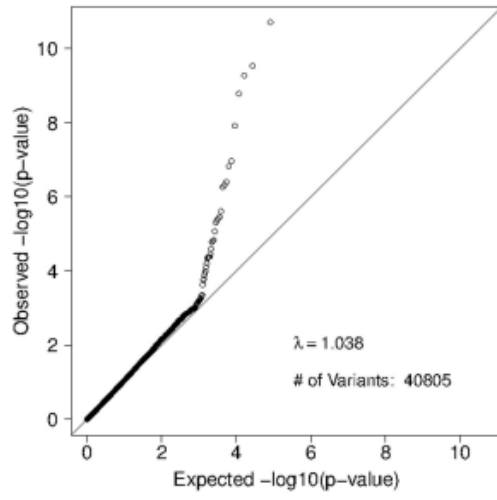

b

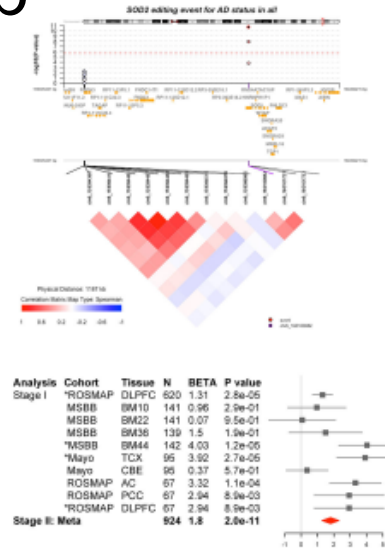

c

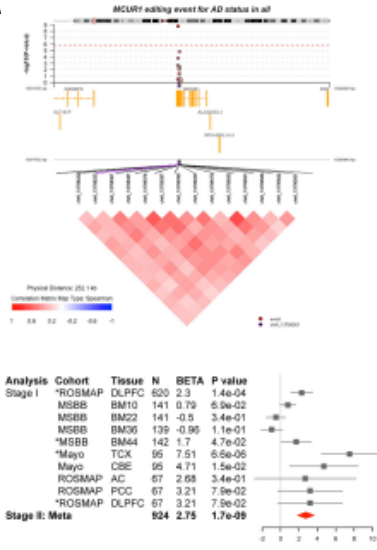

d

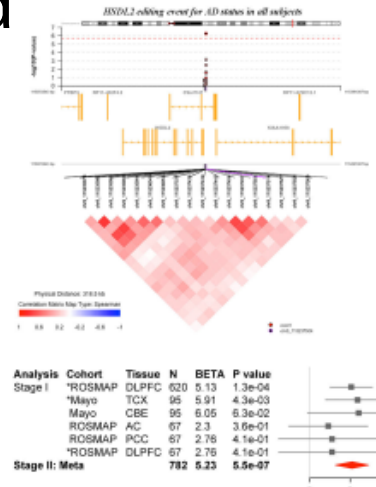

e

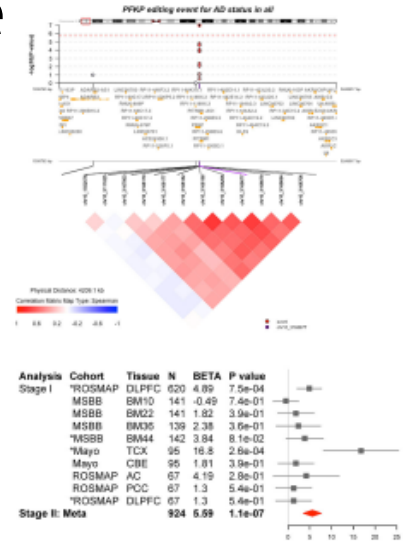

82 Fig. S6. Distribution of frequent RNA recoding events across all datasets and their associations  
83 with AD status compared to the non-coding events. (a), Percentage and number of RNA recoding  
84 events called in different RNA-seq datasets. The percentages are shown in blue bars and the  
85 number on each bar represent the counts of RNA recoding event. (b), Box plots (upper panel)  
86 and density plots (lower panel) showed the comparisons of the AD association  $P$  values ( $-\log_{10}$ )  
87 of the non-coding (gold) and re-coding events (blue) called across all different studies with  
88 RNA-seq datasets. The samples size ( $N$ ) for each study are 635 subjects in the unpaired  
89 ROSMAP DLPFC dataset, 68 subjects in the paired ROSMAP datasets, 142 subjects in the  
90 paired MSBB datasets, and 229 subjects in the paired MAYO datasets. Y axis showed their  
91 meta-analyzed  $P$  values for the general linear model (glm) with RNA editing level (% alternative  
92 reads) as dependent variable, clinical AD status (0, 1, and 2 represent normal controls, mild  
93 cognitive impairment (MCI), and AD patients) as exposure variable, and covariates include sex,  
94 age at death, PMI, RIN, experimental batch, study (in 2 of the ROSMAP DLPFC datasets), race  
95 (in MSBB BM44 dataset), and tissue source (in MAYO temporal cortex dataset). The  
96 distributions of the  $P$  values by different types of RNA editing events across all datasets are  
97 represented by boxplots where the minimum and the maximum values are represented by the  
98 lowest and highest end of the vertical line passing the center of the box, and the first quartile  
99 (25%), the median (50%), the third quartile (75%) of the values are represented as the lower,  
100 center, and the higher horizontal lines of the box.

a

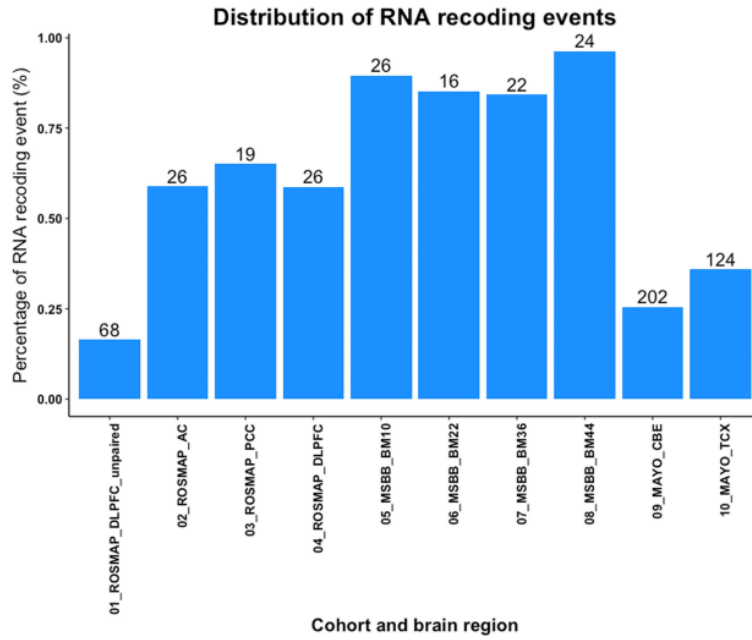

b

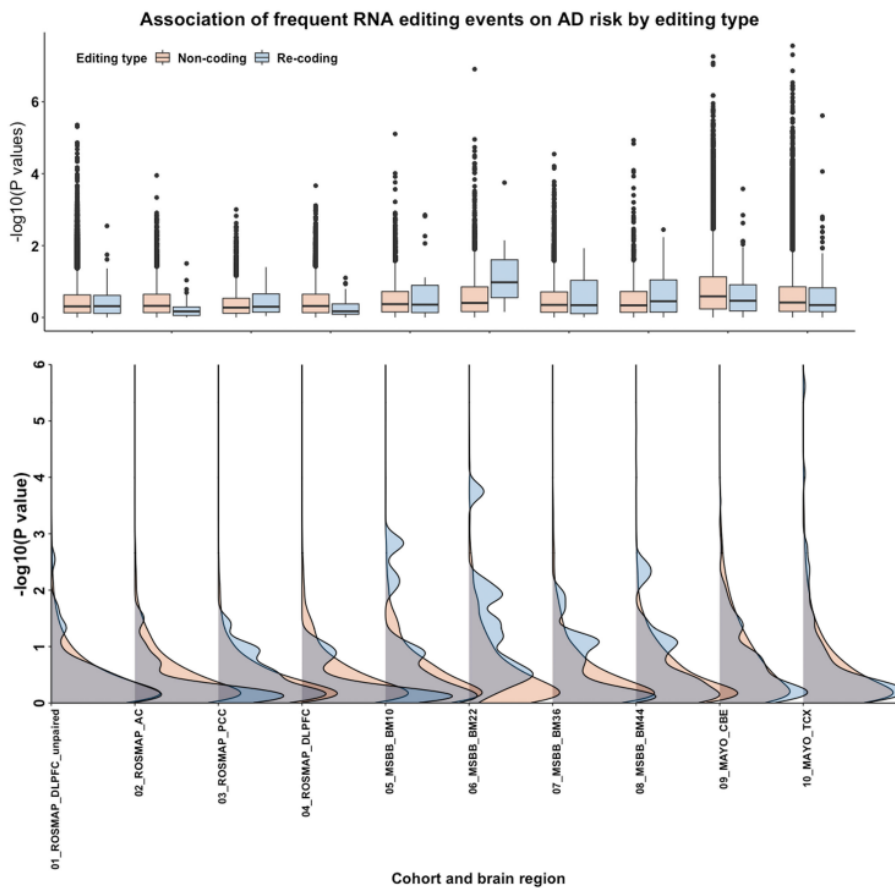

101

102

103 Fig. S7. Functions of the principal components derived from the top AD associated editing  
104 events on the expressions of genes, isoforms and proteins. The matrix plot shows the associations  
105 of the 7 principal components (PCs) derived from the 7 top RNA editing events with expressions  
106 of the mRNA and protein expressions of the genes (a,c) and isoforms (b) harboring the editing  
107 event. The signed  $-\log_{10}(P)$  values were presented and coded for different colors where white  
108 was for values between -1.3 to 1.3 ( $P=0.05$ ), darkening blue was for negative values from 0, and  
109 darkening red was for positive values from 0. The displayed  $P$  values were not adjusted by the  
110 multiple testings and were derived by two-sided tests.

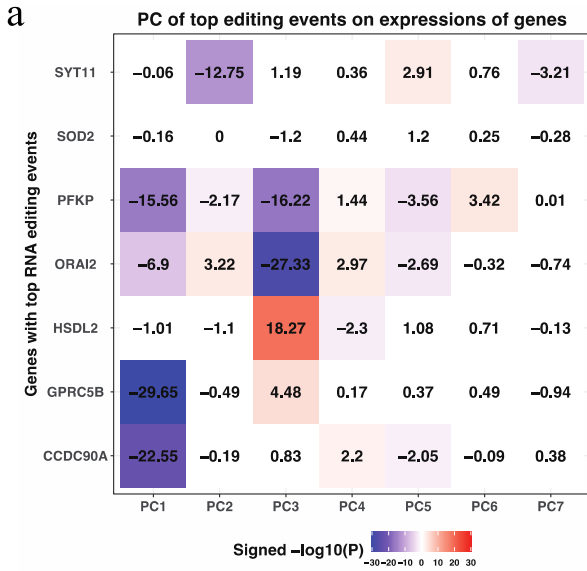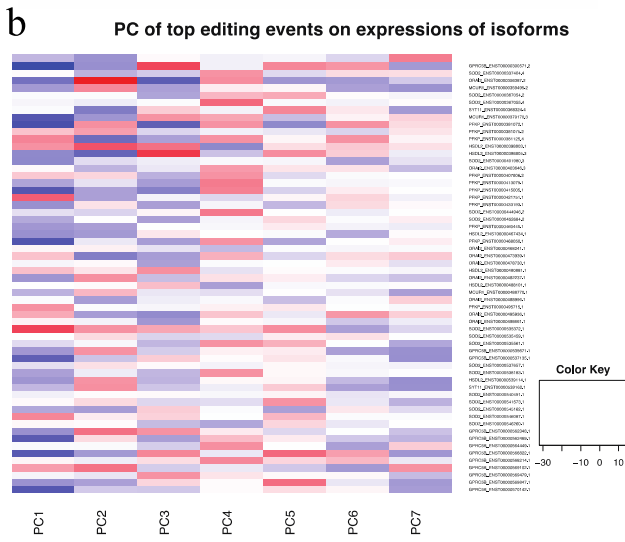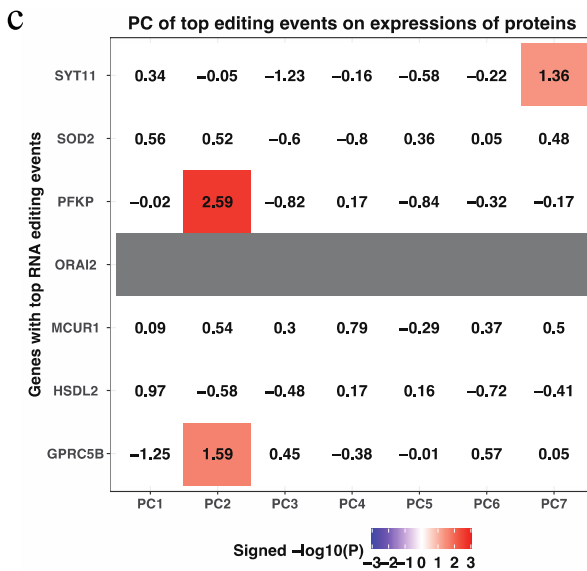

112 Fig. S8. Mass-spectrometry figure of edited peptide (frequency  $\geq 50\%$ ) hits in ROSMAP TMT  
 113 proteomic dataset. The edited peptide hits are mapped to RNA editing events at *CADPS*  
 114 (chr3:62860434, upper left), *GRIA3* (chrX:122598962, upper right), *CACNG8* (chr19:54485579,  
 115 middle left), *GRIA3* (chrX:122598962, middle right), *GRIA2* (chr4:158281294, bottom left and  
 116 right). Within each mass-spectrometry plot, X axis represents the ratio of mass to charge number  
 117 of y and b ions, and the Y axis represent the relative abundance of each peak.

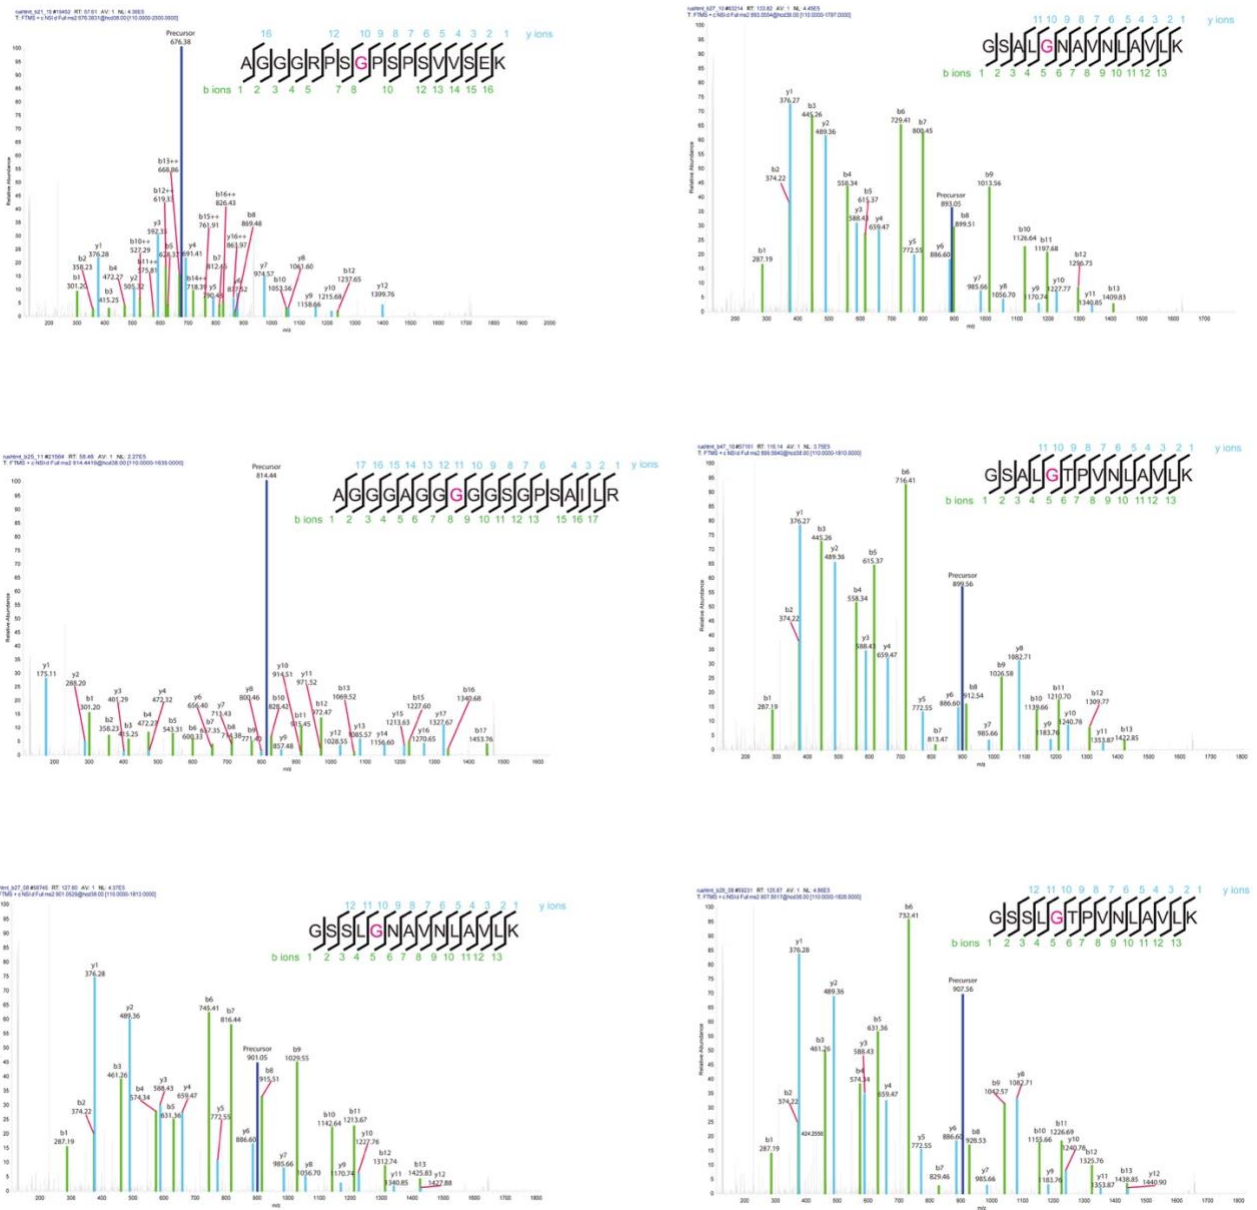

118

119 Table S1. Characteristic of the cohorts and picard metrics of RNA-seq datasets.

| Characteristics of cohorts         |          |              |                    |                        |                       |                |
|------------------------------------|----------|--------------|--------------------|------------------------|-----------------------|----------------|
| Data type                          | Study    | Brain region | AD status          | N                      | Age at death (years)* | Female (N, %)* |
| Paired                             | MAYO     | CBE          | All                | 229                    | 79.62 (8.23)          | 112, 48.91     |
|                                    |          | TCX          | Normal controls    | 62                     | 82.55 (8.30)          | 29, 46.77      |
|                                    |          |              | MCI                | 0                      | NA                    | NA             |
|                                    |          | AD cases     |                    | 65                     | 82.29 (7.16)          | 38, 58.46      |
|                                    |          |              | PSP                |                        | 102                   | 76.14 (7.52)   |
|                                    | MSBB     | BM10         | All                | 142                    | 83.05 (7.85)          | 93, 65.49      |
|                                    |          | BM22         | Normal controls    | 20                     | 82.45 (8.15)          | 12, 60         |
|                                    |          | BM36         | MCI                | 24                     | 79.29 (10.53)         | 11, 45.83      |
|                                    |          | BM44         | AD cases           | 98                     | 84.1 (6.76)           | 70, 71.43      |
|                                    | ROSMAP   | AC           | All                | 68                     | 91.35 (6.78)          | 42, 61.76      |
|                                    |          | DLPFC        | Normal controls    | 23                     | 90.67 (6.55)          | 11, 47.83      |
|                                    |          |              | MCI                | 15                     | 95.05 (4.63)          | 11, 73.33      |
|                                    |          | AD cases     |                    | 29                     | 89.81 (7.39)          | 19, 65.52      |
|                                    | Unpaired | ROSMAP       | DLPFC              | All                    | 635                   | 88.71 (6.65)   |
| Normal controls                    |          |              |                    | 200                    | 86.11 (6.75)          | 122, 61        |
| MCI                                |          |              |                    | 167                    | 88.84 (6.04)          | 105, 62.87     |
| AD cases                           |          |              |                    | 255                    | 90.73 (6.26)          | 172, 67.45     |
| Picard metrics of RNA-seq datasets |          |              |                    |                        |                       |                |
| Picard metrics / Data type         | Study    | Brain region | Mean (SD)#         | Comparison to MAYO CBE |                       |                |
|                                    |          |              |                    | BETA#                  | SE#                   | p#             |
| Total reads (N)                    |          |              |                    |                        |                       |                |
| Paired                             | MAYO     | CBE          | 45762142(8917944)  | reference              | reference             | reference      |
|                                    |          | TCX          | 45002272(8941394)  | -759869.8              | 732325                | 3.00E-01       |
|                                    | MSBB     | BM10         | 17530795(5048660)  | -28231347.4            | 837011.9              | 6.72E-195      |
|                                    |          | BM22         | 16583964(4761792)  | -29178177.8            | 837011.9              | 3.23E-205      |
|                                    |          | BM36         | 15810183(4292940)  | -29951959.3            | 837011.9              | 1.06E-213      |
|                                    |          | BM44         | 21690336(7302082)  | -24071806.6            | 837011.9              | 1.01E-150      |
|                                    | ROSMAP   | AC           | 36312847(5129869)  | -9449295.4             | 1082212.7             | 5.50E-18       |
|                                    |          | DLPFC        | 39105695(10822802) | -6656447.6             | 1082212.7             | 9.42E-10       |
|                                    |          |              | PCC                | 37943854(5685988)      | -7818288.2            | 1082212.7      |
|                                    |          | Unpaired     | ROSMAP             | DLPFC                  | 28278275(8778985)     | -17483867.5    |
| Aligned reads (N)                  |          |              |                    |                        |                       |                |
| Paired                             | MAYO     | CBE          | 45185927(8770988)  | reference              | reference             | reference      |

|          |        |       |                    |             |           |           |
|----------|--------|-------|--------------------|-------------|-----------|-----------|
|          |        | TCX   | 44501837(8813148)  | -684090.2   | 717854.6  | 3.41E-01  |
|          |        | BM10  | 17314608(5038827)  | -27871318.7 | 820473    | 4.31E-197 |
|          | MSBB   | BM22  | 16412370(4752375)  | -28773557.2 | 820473    | 3.88E-207 |
|          |        | BM36  | 15656050(4260491)  | -29529876.6 | 820473    | 1.31E-215 |
|          |        | BM44  | 21518386(7297171)  | -23667541.2 | 820473    | 1.78E-151 |
|          |        | AC    | 34444757(5010850)  | -10741170   | 1060828.7 | 1.72E-23  |
|          | ROSMAP | DLPFC | 37204812(10833602) | -7981115.3  | 1060828.7 | 8.27E-14  |
|          |        | PCC   | 35986334(5548391)  | -9199592.6  | 1060828.7 | 9.09E-18  |
| Unpaired | ROSMAP | DLPFC | 27160757(8495879)  | -18025170   | 592095.1  | 1.93E-165 |

#### Uniquely aligned reads (N)

|          |        |       |                    |             |           |           |
|----------|--------|-------|--------------------|-------------|-----------|-----------|
|          |        | CBE   | 41769995(8130814)  | reference   | reference | reference |
|          | MAYO   | TCX   | 40915115(8147291)  | -854880.4   | 661521.3  | 1.96E-01  |
|          |        | BM10  | 14178561(4104213)  | -27591434.6 | 756086.7  | 3.14E-220 |
|          | MSBB   | BM22  | 13279733(4045273)  | -28490262.6 | 756086.7  | 3.13E-231 |
| Paired   |        | BM36  | 12834868(3397540)  | -28935126.9 | 756086.7  | 1.08E-236 |
|          |        | BM44  | 16667204(5682457)  | -25102791.3 | 756086.7  | 4.12E-190 |
|          |        | AC    | 32777825(4724429)  | -8992169.8  | 977580.6  | 9.48E-20  |
|          | ROSMAP | DLPFC | 35330631(10327461) | -6439364.4  | 977580.6  | 5.83E-11  |
|          |        | PCC   | 34154475(5230901)  | -7615519.8  | 977580.6  | 1.11E-14  |
| Unpaired | ROSMAP | DLPFC | 25841144(8081045)  | -15928851   | 545630.7  | 1.72E-154 |

#### Ribosomal bases (%)

|          |        |       |            |            |           |           |
|----------|--------|-------|------------|------------|-----------|-----------|
|          |        | CBE   | 1.79(0.64) | reference  | reference | reference |
|          | MAYO   | TCX   | 2.65(0.97) | 0.8643061  | 0.1707043 | 4.53E-07  |
|          |        | BM10  | 0.74(3.44) | -1.0519114 | 0.1951067 | 7.88E-08  |
|          | MSBB   | BM22  | 0.83(1.54) | -0.9601917 | 0.1951067 | 9.35E-07  |
| Paired   |        | BM36  | 0.37(0.46) | -1.4234333 | 0.1951067 | 4.38E-13  |
|          |        | BM44  | 1.27(4.76) | -0.5242833 | 0.1951067 | 7.27E-03  |
|          |        | AC    | 0.6(0.18)  | -1.1944694 | 0.2522628 | 2.36E-06  |
|          | ROSMAP | DLPFC | 0.7(0.21)  | -1.0902018 | 0.2522628 | 1.63E-05  |
|          |        | PCC   | 0.58(0.24) | -1.2066312 | 0.2522628 | 1.86E-06  |
| Unpaired | ROSMAP | DLPFC | 2.89(1)    | 1.1036106  | 0.140799  | 7.64E-15  |

#### Median 3' bias

|        |        |      |            |             |            |           |
|--------|--------|------|------------|-------------|------------|-----------|
|        |        | CBE  | 0.68(0.07) | reference   | reference  | reference |
|        | MAYO   | TCX  | 0.7(0.07)  | 0.01959141  | 0.01411924 | 1.65E-01  |
|        |        | BM10 | 0.96(0.07) | 0.27558379  | 0.01613761 | 7.66E-61  |
| Paired | MSBB   | BM22 | 0.94(0.07) | 0.25440768  | 0.01613761 | 1.21E-52  |
|        |        | BM36 | 0.93(0.05) | 0.24507238  | 0.01613761 | 3.48E-49  |
|        |        | BM44 | 0.86(0.07) | 0.18117453  | 0.01613761 | 2.41E-28  |
|        | ROSMAP | AC   | 0.56(0.04) | -0.12711676 | 0.02086508 | 1.35E-09  |



|          |        |       |            |             |            |          |
|----------|--------|-------|------------|-------------|------------|----------|
|          |        | DLPFC | 0.63(0.05) | -0.05676807 | 0.02086508 | 6.57E-03 |
|          |        | PCC   | 0.61(0.05) | -0.07113098 | 0.02086508 | 6.66E-04 |
| Unpaired | ROSMAP | DLPFC | 1.3(0.24)  | 0.61886072  | 0.01164572 | 0.00E+00 |

Correlation between number of editing events and total reads

| Data type | Study  | Brain region | N of subjects | N of editing events (mean,SD) | R    | P         |
|-----------|--------|--------------|---------------|-------------------------------|------|-----------|
|           |        |              | 229           | 27060.24, 10538.6             | 0.5  | 7.57E-16  |
|           | MAYO   | CBE          |               |                               |      |           |
|           |        | TCX          | 229           | 12490.45, 3330.1              | 0.69 | < 2.2E-16 |
|           |        | BM10         | 142           | 857.95, 397.52                | 0.78 | < 2.2E-16 |
| Paired    | MSBB   | BM22         | 142           | 602.19, 198.07                | 0.78 | < 2.2E-16 |
|           |        | BM36         | 142           | 771.55, 302.95                | 0.78 | < 2.2E-16 |
|           |        | BM44         | 142           | 872.48, 344.30                | 0.86 | < 2.2E-16 |
|           |        | AC           | 68            | 1544.57, 613.03               | 0.16 | 0.19      |
|           | ROSMAP | DLPFC        | 68            | 1474.37, 675.52               | 0.29 | 0.01      |
|           |        | PCC          | 68            | 881.37, 446.84                | 0.02 | 0.86      |
| Unpaired  | ROSMAP | DLPFC        | 635           | 12257.07, 7006.66             | 0.31 | 3.00E-15  |

120 \*Age at death is represented by mean (SD) and female is represented by number (N) and percentage (%)  
121 #BETA represent the difference in each picard metric between MAYO CBE dataset compared to all the other 9  
122 datasets, and the SE and P represent the corresponding standard error and P value. The displayed P values were not  
123 adjusted by the multiple testings and were derived by two-sided tests.  
124 Abbreviation: SD, standard deviation; MAYO, Mayo RNAseq study; CBE, cerebellum; TCX, temporal cortex;  
125 MSBB, Mount Sinai Brain Bank; AC, anterior cingulate cortex; DLPFC, dorsolateral prefrontal cortex; PCC,  
126 posterior cingulate cortex; PSP, progressive supranuclear palsy.  
127

128

129 Table S2. The recoding RNA editing events with proteomic peptide hits.

| Annotation^                   |                              |                           |             |                 |                       |
|-------------------------------|------------------------------|---------------------------|-------------|-----------------|-----------------------|
| Unique identifier             | NM                           | CDS                       | Exon number | DNA substitute  | Amino acid substitute |
| chr1_16133978_UQCRHL          | NM_001089591.1               | 51 to 326                 | 1           | A65G            | E22G                  |
| chr1_110256304_GSTM5_peptide1 | NM_000851.3                  | 72 to 728                 | 5           | A281G           | K94R                  |
| chr1_110256304_GSTM5_peptide2 |                              |                           |             |                 |                       |
| chr1_160302244_COPA           | NM_001098398.1               | 395 to 4096               | 6           | A490G           | I164V                 |
| chr3_62423807_CADPS           | NM_183393.2                  | 361 to 4185               | 25          | A3512G          | E1171G                |
| chr3_62860434_CADPS           | NM_183393.2                  | 361 to 4185               | 1           | A271G           | S91G                  |
| chr4_158281294_GRIA2_peptide1 | NM_001083619.1               | 460 to 3111               | 13          | A2290G          | R764G                 |
| chr4_158281294_GRIA2_peptide2 | NM_000826.3 / NM_001083620.1 | 460 to 3111 / 112 to 2622 | 13          | A2290G / A2149G | R764G / R717G         |
| chr6_26104432_HIST1H4C        | NM_003542.3                  | 1 to 312                  | 1           | A257G           | D86G                  |
| chr19_47152737_DACT3          | NM_001301046.1               | 442 to 1656               | 4           | A217G           | S73G                  |
| chr19_54485579_CACNG8         | NM_031895.5                  | 108 to 1385               | 4           | A754G           | S252G                 |
| chrX_122598962_GRIA3_peptide1 | NM_000828.4                  | 294 to 2978               | 13          | A2323G          | R775G                 |

chrX\_122598962\_GRIA3\_peptide2

NM\_007325.4

294 to 2978

13

A2323G

R775G

Annotation<sup>^</sup>

| Unique identifier             | RNA sequence <sup>&amp;</sup>                                                           | Edited peptide sequence       | Non-edited peptide sequence  |
|-------------------------------|-----------------------------------------------------------------------------------------|-------------------------------|------------------------------|
| chr1_16133978_UQCRHL          | 75atgctaccgaatccggagatcctgagggaggaagaggA[G]agaggaggaattagtgatccccta<br>acaacagtgagag253 | 9MLTESGDPEEEEEEGEELVDPLTTVR24 | 9MLTESGDPEEEEEEEELVDPLTTVR24 |
| chr1_110256304_GSTM5_peptide1 | 316caagcacaacctgtgtggggagacagaagaggagaA[G]ga354                                         | 83KHNLCGETEEEEK94             | 83KHNLCGETEEEEK94            |
| chr1_110256304_GSTM5_peptide2 |                                                                                         | 84HNLCEEEEEK94                | 84HNLCEEEEEK94               |
| chr1_160302244_COPA           | 875gtttggatA[G]tttctgtctgagg898                                                         | 161VWDVVSGLR168               | 161VWDISGLR168               |
| chr3_62423807_CADPS           | 3863aggtcaatgA[G]ggagatgtacatagaaggt3892                                                | 1169VNGEMYIER1177             | 1169VNEEMYIER1177            |
| chr3_62860434_CADPS           | 610gctggcggcggccgcccctcA[G]gccccagcccgtcgggtgtgagcagagaag660                            | 84AGGGRPSGPSPSVSEK100         | 84AGGGRPSGPSPSVSEK100        |
| chr4_158281294_GRIA2_peptide1 | 2737ggatcctcattaaA[G]aatgctgttaacctgcagactactaaaa2778                                   | 760GSSLGNVAVNLAVLK773         | 765NAVNLAVLK773              |
| chr4_158281294_GRIA2_peptide2 | 2737/2248ggatcctcattaaA[G]aaccccagtaaatcttgcagattgaaa2778/2289                          | 760/713GSSLGTPVNLAVLK773/726  | 765/718NAVNLAVLK773/726      |
| chr6_26104432_HIST1H4C        | 240aaactgtcacagccatggA[G]ttagtatatgccttaaac277                                          | 81TVTAMGVVYALK92              | 81TVTAMDVVYALK92             |
| chr19_47152737_DACT3          | 625cagcggcggccggcggcgtctccgccccggcA[G]gcgcgcgaccggcggg675                               | 62QRPPDASPSPGGARPAR78         | 62QRPPDASPSPGARSARPAR78      |
| chr19_54485579_CACNG8         | 840gccggcggggcgccggcgccA[G]gtggcggggcggccccctggccatcctcgt893                            | 245AGGGAGGGGGSGPSAILR262      | 245AGGGAGGGGGSGPSAILR262     |
| chrX_122598962_GRIA3_peptide1 | 2604ggetcagcattagA[G]aatgctgttaacctgcagattataaa2645                                     | 771GSALGNVAVNLAVLK784         | 776NAVNLAVLK784              |
| chrX_122598962_GRIA3_peptide2 | 2604ggetcagcattagA[G]aacgcctgtaacctgcagattgaaa2645                                      |                               | 776TPVNLAVLK784              |

## Concordance, correlation, and expression levels

| Unique identifier             | Concordance <sup>§</sup> |              |             |             | Correlation <sup>*</sup> |      | Expression level <sup>#</sup> |                                     |                                         |
|-------------------------------|--------------------------|--------------|-------------|-------------|--------------------------|------|-------------------------------|-------------------------------------|-----------------------------------------|
|                               | N1, %                    | N2, %        | N3, %       | N4, %       | r                        | P    | Edited RNA reads (%)          | Edited peptide quantity (abundance) | Non_edited peptide quantity (abundance) |
| chr1_16133978_UQCRHL          | 13, 7.6 %                | 84, 49.12 %  | 60, 35.09 % | 14, 8.19 %  | 0.07                     | 0.39 | 33.67±40.05                   | 13.5±2.73                           | 7.7±1.87                                |
| chr1_110256304_GSTM5_peptide1 | 0, 0 %                   | 164, 95.91 % | 5, 2.92 %   | 2, 1.17 %   | 0.02                     | 0.83 | 0.46±2.34                     | 56.48±37.39                         | 95.97±75.13                             |
| chr1_110256304_GSTM5_peptide2 | 2, 1.17 %                | 89, 52.05 %  | 3, 1.75 %   | 77, 45.03 % | 0.03                     | 0.70 |                               | 44.98±14.25                         | 585.09±446.40                           |

|                               |              |              |             |              |      |          |              |              |                |
|-------------------------------|--------------|--------------|-------------|--------------|------|----------|--------------|--------------|----------------|
| chr1_160302244_COPA           | 23, 13.45 %  | 54, 31.58 %  | 74, 43.27 % | 20, 11.7 %   | 0.08 | 0.30     | 13.27±13.80  | 127.3±8.2    | 239.06±20.12   |
| chr3_62423807_CADPS           | 47, 27.49 %  | 30, 17.54 %  | 82, 47.95 % | 12, 7.02 %   | -    | 0.05     | 14.67±9.95   | 177.36±17.56 | 507.38±45.40   |
| chr3_62860434_CADPS           | 0, 0 %       | 19, 11.11 %  | 0, 0 %      | 152, 88.89 % | NA   | NA       | 0.03±0.73    | 229.97±23.26 | 929.77±49.22   |
| chr4_158281294_GRIA2_peptide1 | 114, 66.67 % | 2, 1.17 %    | 15, 8.77 %  | 40, 23.39 %  | -    | 0.09     | 0.30±0.20    | 738.08±62.41 | 581.38±48.07   |
| chr4_158281294_GRIA2_peptide2 | 114, 66.67 % | 2, 1.17 %    | 15, 8.77 %  | 40, 23.39 %  | -    | 0.08     | 500.35±69.07 | 197.64±20.95 |                |
| chr6_26104432_HIST1H4C        | 1, 0.58 %    | 167, 97.66 % | 0, 0 %      | 3, 1.75 %    | -    | 0.29     | 0.07±1.83    | 54.57±52.73  | 2003.41±916.83 |
| chr19_47152737_DACT3          | 2, 1.17 %    | 157, 91.81 % | 5, 2.92 %   | 7, 4.09 %    | 0.24 | 1.40E-03 | 3.82±15.58   | 18.04±4.62   | NA             |
| chr19_54485579_CACNG8         | 18, 10.53 %  | 15, 8.77 %   | 2, 1.17 %   | 136, 79.53 % | 0.02 | 0.78     | 2.15±6.33    | 85.89±11.66  | 501.95±48.83   |
| chrX_122598962_GRIA3_peptide1 | 83, 48.54 %  | 6, 3.51 %    | 11, 6.43 %  | 71, 41.52 %  | 0.21 | 6.74E-03 | 49.78±45.77  | 577.77±44.71 | 581.38±48.07   |
| chrX_122598962_GRIA3_peptide2 | 83, 48.54 %  | 6, 3.51 %    | 11, 6.43 %  | 71, 41.52 %  | -    | 0.07     | 545.44±64.34 | 197.64±20.95 |                |

## AD association@

| Unique identifier             | Reported event | Reported AD association | Peptide |        |       | RNA |       |        |          |
|-------------------------------|----------------|-------------------------|---------|--------|-------|-----|-------|--------|----------|
|                               |                |                         | BETA    | STDERR | P     | N   | BETA  | STDERR | P        |
| chr1_16133978_UQCRHL          | No             | No                      | -0.007  | 0.03   | 0.84  | 269 | -2.22 | 1.71   | 0.20     |
| chr1_110256304_GSTM5_peptide1 | Yes            | No                      | 0.004   | 0.01   | 0.66  | 25  | 0.32  | 0.12   | 6.40E-03 |
| chr1_110256304_GSTM5_peptide2 |                |                         | 0.492   | 0.20   | 0.01  |     |       |        |          |
| chr1_160302244_COPA           | Yes            | Yes                     | -0.047  | 0.04   | 0.22  | 346 | 1.31  | 0.65   | 0.04     |
| chr3_62423807_CADPS           | Yes            | No                      | 0.000   | 0.07   | 0.995 | 469 | -0.85 | 0.43   | 0.05     |
| chr3_62860434_CADPS           | Yes            | No                      | 0.024   | 0.07   | 0.72  | 1   | -0.05 | 0.04   | 0.22     |
| chr4_158281294_GRIA2_peptide1 | Yes            | Yes                     | -0.014  | 0.02   | 0.46  | 458 | -1.15 | 0.85   | 0.18     |
| chr4_158281294_GRIA2_peptide2 |                |                         | -0.022  | 0.05   | 0.67  |     |       |        |          |
| chr6_26104432_HIST1H4C        | No             | No                      | -0.093  | 0.10   | 0.33  | 1   | -0.07 | 0.09   | 0.47     |
| chr19_47152737_DACT3          | Yes            | No                      | -0.156  | 0.09   | 0.09  | 38  | -0.18 | 0.75   | 0.81     |
| chr19_54485579_CACNG8         | Yes            | No                      | -0.010  | 0.08   | 0.91  | 72  | -0.04 | 0.30   | 0.89     |
| chrX_122598962_GRIA3_peptide1 | Yes            | Yes                     | -0.022  | 0.01   | 0.04  | 346 | -5.40 | 2.24   | 0.02     |

130 ^On both the RNA and peptide level, the nucleotide and amino acid at the editing site were represented by the two red characters  
131 separated by slash. The left character is the non-edited one while the right character in the bracket is the edited one.  
132 \$N1, %: Number and percentage of subjects with detection of editings on both RNA and peptide level; N2, %: Number and  
133 percentage of subjects without detection of editings on either RNA or peptide level; N3, %: Number and percentage of subjects with  
134 detection of editing on RNA but not peptide level; N4, %: Number and percentage of subjects with detection of editing on peptide but  
135 not RNA level. Chi-square and corresponding P values for the contingency table of the four numbers are displayed.  
136 \*r and P represent the correlation coefficient and corresponding P value between fraction of edited RNA read and abundance.  
137 #Values are represented by mean  $\pm$  SD. Edited RNA reads were represented by the percentage of alternative read over the total  
138 amount of reads at that locus. On the peptide level, unit are shown in both the normalized abundance.  
139 @N represent the number of subjects (out of total 635) carrying the editing event. BETA, STDERR, and P represent the regression  
140 coefficient, standard error and corresponding P values of the generalized linear model of RNA editing level (log2 of the ratio of the  
141 normalized abundance of the edited peptide over the nonedited peptide and % alternative allele on RNA level) as the dependent  
142 variable and clinical AD status (0, 1, and 2 represent normal controls, mild cognitive impairment (MCI), and AD patients) as exposure  
143 variable, and covariates include sex, age at death, postmortem interval (PMI), study (ROS or MAP), RIN and experimental batch (for  
144 RNA dataset). Peptide analysis is within 166 subjects with available data of all the variables included in the analysis and also those  
145 subjects with RNA-seq datasets. RNA-seq analysis include 620 subjects with RNA-seq datasets and all the included variables. All the  
146 statistical tests are two-sided.  
147  
148  
149  
150  
151  
152  
153

Table S3. Regional differences in gene expressions of *ADARs*.

| Study                             | Comparison                | ADAR genes                | N     | BETA <sup>&amp;</sup> | STDERR <sup>&amp;</sup> | p <sup>&amp;</sup> |
|-----------------------------------|---------------------------|---------------------------|-------|-----------------------|-------------------------|--------------------|
| ROSMAP<br>multi-region#<br>(N=68) | AC - DLPFC                | <i>ADAR1</i>              | 68    | -0.64                 | 1.21                    | 0.6                |
|                                   |                           | <i>ADAR2</i>              | 68    | -2.16                 | 0.32                    | 1.20E-11           |
|                                   |                           | <i>ADAR3</i>              | 68    | 0.25                  | 0.36                    | 0.49               |
|                                   |                           | <i>ADARs</i> <sup>§</sup> | 68    | -3.01                 | 1.44                    | 0.04               |
|                                   | PCC - DLPFC               | <i>ADAR1</i>              | 68    | -8.14                 | 1.06                    | 1.80E-14           |
|                                   |                           | <i>ADAR2</i>              | 68    | -2.24                 | 0.3                     | 6.20E-14           |
|                                   |                           | <i>ADAR3</i>              | 68    | -2.25                 | 0.32                    | 1.00E-12           |
|                                   |                           | <i>ADARs</i> <sup>§</sup> | 68    | -8.11                 | 1.34                    | 1.40E-09           |
|                                   | PCC - AC                  | <i>ADAR1</i>              | 68    | -7.07                 | 1.18                    | 1.90E-09           |
|                                   |                           | <i>ADAR2</i>              | 68    | -0.07                 | 0.28                    | 0.79               |
|                                   |                           | <i>ADAR3</i>              | 68    | -2.45                 | 0.36                    | 1.30E-11           |
|                                   |                           | <i>ADARs</i> <sup>§</sup> | 68    | -4.68                 | 1.41                    | 9.30E-04           |
| MSBB*<br>(N=142)                  | BM36 - BM44               | <i>ADAR1</i>              | 142   | -966                  | 252                     | 1.20E-04           |
|                                   |                           | <i>ADAR2</i>              | 142   | -160                  | 49.7                    | 1.30E-03           |
|                                   |                           | <i>ADAR3</i>              | 142   | -341                  | 57.7                    | 3.60E-09           |
|                                   |                           | <i>ADARs</i> <sup>§</sup> | 142   | -778                  | 264                     | 3.30E-03           |
|                                   | BM36 - BM10               | <i>ADAR1</i>              | 142   | -146                  | 193                     | 0.45               |
|                                   |                           | <i>ADAR2</i>              | 142   | -148                  | 35.8                    | 3.90E-05           |
|                                   |                           | <i>ADAR3</i>              | 142   | 104                   | 37.1                    | 4.90E-03           |
|                                   |                           | <i>ADARs</i> <sup>§</sup> | 142   | -396                  | 198                     | 0.05               |
|                                   | BM36 - BM22               | <i>ADAR1</i>              | 142   | 121                   | 142                     | 0.39               |
|                                   |                           | <i>ADAR2</i>              | 142   | -132                  | 31.6                    | 3.00E-05           |
|                                   |                           | <i>ADAR3</i>              | 142   | 26.3                  | 30.8                    | 0.39               |
|                                   |                           | <i>ADARs</i> <sup>§</sup> | 142   | -41.5                 | 150                     | 0.78               |
| BM22 - BM10                       | <i>ADAR1</i>              | 142                       | -238  | 183                   | 0.19                    |                    |
|                                   | <i>ADAR2</i>              | 142                       | -17.8 | 37.9                  | 0.64                    |                    |
|                                   | <i>ADAR3</i>              | 142                       | 93.7  | 32.1                  | 3.50E-03                |                    |
|                                   | <i>ADARs</i> <sup>§</sup> | 142                       | -350  | 195                   | 0.07                    |                    |
| BM44 - BM10                       | <i>ADAR1</i>              | 142                       | 937   | 254                   | 2.20E-04                |                    |
|                                   | <i>ADAR2</i>              | 142                       | 17.9  | 49.3                  | 0.72                    |                    |
|                                   | <i>ADAR3</i>              | 142                       | 457   | 54.9                  | 1.10E-16                |                    |
|                                   | <i>ADARs</i> <sup>§</sup> | 142                       | 491   | 260                   | 0.06                    |                    |
| BM22 - BM44                       | <i>ADAR1</i>              | 142                       | -1030 | 231                   | 9.10E-06                |                    |
|                                   | <i>ADAR2</i>              | 142                       | -32.1 | 51.2                  | 0.53                    |                    |
|                                   | <i>ADAR3</i>              | 142                       | -318  | 50.2                  | 2.40E-10                |                    |

|         |           |                           |     |        |     |          |
|---------|-----------|---------------------------|-----|--------|-----|----------|
|         |           | <i>ADARs</i> <sup>§</sup> | 142 | -767   | 244 | 1.70E-03 |
|         | TCX - CBE | <i>ADAR1</i>              | 229 | -2250  | 325 | 3.90E-12 |
| MAYO*   |           | <i>ADAR2</i>              | 229 | -7500  | 263 | <2.2E-16 |
| (N=229) |           | <i>ADAR3</i>              | 229 | 1460   | 145 | <2.2E-16 |
|         |           | <i>ADARs</i> <sup>§</sup> | 229 | -11200 | 578 | <2.2E-16 |

155 #Gene expression units for ROSMAP multi-region study are represented by transcripts per  
156 million (TPM) values obtained through RSEM tool with the reference transcriptome of  
157 GENCODE v24.

158 \*Gene expression units for MSSB and MAYO RNA-seq study are represented by counts of the  
159 reads of the gene using STAR tool by setting quantMode as GeneCounts according to the  
160 reference transcriptome of GENCODE v24.

161 § ADARs = ADAR1+ADAR2-ADAR3.

162 & The BETA, STDERR, and *P* represent the regression coefficient, standard error, and the  
163 corresponding P values for the exposure variable of region (coded as 1 for one brain region and 0  
164 for the other brain region) in the general linear mixed model using R lme package with  
165 dependent variable of gene expression levels of ADARs, random effect of subject ID, and fixed  
166 effects of the covariates including age at death, sex, postmortem interval (PMI), and RIN score.  
167 The displayed *P* values were not adjusted by the multiple testings and were derived by two-sided  
168 tests.

169

170

171 Table S4. Top RNA editing events associated with AD status.

| Associations with AD status in Stage I and II <sup>#</sup>        |                           |                          |               |          |          |               |           |          |
|-------------------------------------------------------------------|---------------------------|--------------------------|---------------|----------|----------|---------------|-----------|----------|
| Gene: top RNA editing                                             | Outcome                   | Stage I                  |               |          | Stage II |               |           |          |
|                                                                   |                           | N                        | BETA (STDERR) | P        | N        | BETA (STDERR) | Direction | P        |
| <i>SYT11:chr1_155851645</i>                                       | AD status in all          | 620                      | 1.36 (0.32)   | 2.09E-05 | 924      | 1.66 (0.26)   | "++++"    | 2.94E-10 |
| <i>MCUR1:chr6_13788361</i>                                        | AD status in all          | 620                      | 2.30 (0.60)   | 1.36E-04 | 924      | 2.75 (0.46)   | "++++"    | 1.66E-09 |
| <i>SOD2:chr6_13788361</i>                                         | AD status in all          | 620                      | 1.31 (0.31)   | 2.75E-05 | 924      | 1.80 (0.27)   | "++++"    | 1.96E-11 |
| <i>ORAI2:chr7_102096952</i>                                       | AD status in all          | 620                      | 2.94 (0.64)   | 4.64E-06 | 782      | 2.74 (0.55)   | "+x++"    | 4.80E-07 |
| <i>HSDL2:chr9_115237504</i>                                       | AD status in all          | 620                      | 5.13 (1.33)   | 1.25E-04 | 782      | 5.23 (1.04)   | "+x++"    | 5.49E-07 |
| <i>PFKP:chr10_3168677</i>                                         | AD status in all          | 620                      | 4.89 (1.44)   | 7.54E-04 | 924      | 5.59 (1.05)   | "++++"    | 1.08E-07 |
| <i>SYT11:chr1_155851645</i>                                       | AD status in females      | 398                      | 1.98 (0.41)   | 1.65E-06 | 581      | 2.23 (0.34)   | "++++"    | 3.60E-11 |
| <i>MCUR1:chr6_13788361</i>                                        | AD status in females      | 398                      | 2.74 (0.78)   | 5.22E-04 | 581      | 2.98 (0.57)   | "++++"    | 2.10E-07 |
| <i>SOD2:chr6_13788361</i>                                         | AD status in females      | 398                      | 1.81 (0.39)   | 4.33E-06 | 581      | 2.13 (0.34)   | "++++"    | 3.08E-10 |
| <i>GPRC5B:chr16_19876365</i>                                      | AD status in females      | 398                      | 5.59 (1.17)   | 2.68E-06 | 448      | 5.87 (1.14)   | "+x+x"    | 2.79E-07 |
| Functional associations in STAGE I unpaired ROSMAP DLPFC samples* |                           |                          |               |          |          |               |           |          |
| Gene: top RNA editing                                             | Outcome Category          | Outcome                  | N             | BETA     | STDERR   | P             |           |          |
| <i>SYT11:chr1_155851645</i>                                       | ADARs gene expression     | <i>ADAR1</i>             | 505           | 0.0427   | 0.0164   | 0.00938       |           |          |
|                                                                   |                           | <i>ADAR2</i>             | 505           | -0.169   | 0.0197   | 1.14E-16      |           |          |
|                                                                   |                           | <i>ADAR3</i>             | 505           | 0.308    | 0.0538   | 1.75E-08      |           |          |
|                                                                   | Target gene expression    | <i>SYT11</i>             | 505           | 0.166    | 0.0334   | 9.60E-07      |           |          |
|                                                                   | Target isoform expression | <i>ENST00000368324.4</i> | 526           | 4.37     | 1.46     | 0.00284       |           |          |
|                                                                   | Target protein expression | <i>SYT11_Q9BT88</i>      | 78            | -0.06    | 0.02     | 0.01          |           |          |
| <i>SOD2:chr6_13788361</i>                                         | ADARs gene expression     | <i>ADAR1</i>             | 505           | 0.00502  | 0.0175   | 0.774         |           |          |
|                                                                   |                           | <i>ADAR2</i>             | 505           | -0.0824  | 0.0221   | 0.00021       |           |          |
|                                                                   |                           | <i>ADAR3</i>             | 505           | 0.19     | 0.0582   | 0.00119       |           |          |
|                                                                   | Target gene expression    | <i>SOD2</i>              | 505           | 0.0517   | 0.0493   | 0.295         |           |          |
|                                                                   | Target isoform expression | <i>ENST00000546260.1</i> | 526           | -0.0528  | 0.0252   | 0.0369        |           |          |
|                                                                   | Target protein expression | <i>SOD2_P04179</i>       | 78            | -0.02    | 0.03     | 0.54          |           |          |
| <i>PFKP:chr10_3168677</i>                                         | ADARs gene expression     | <i>ADAR1</i>             | 505           | 0.0481   | 0.0164   | 0.00346       |           |          |
|                                                                   |                           | <i>ADAR2</i>             | 505           | 0.0158   | 0.0211   | 0.455         |           |          |



|                              |                           |                          |     |         |        |          |
|------------------------------|---------------------------|--------------------------|-----|---------|--------|----------|
|                              |                           | <i>ADAR3</i>             | 505 | 0.0959  | 0.0554 | 0.0841   |
|                              | Target gene expression    | <i>PFKP</i>              | 505 | 0.388   | 0.0376 | 9.17E-23 |
|                              | Target isoform expression | <i>ENST00000381072.1</i> | 526 | 22.3    | 1.97   | 1.00E-26 |
|                              | Target protein expression | <i>PFKP_Q01813</i>       | 78  | -0.01   | 0.02   | 0.61     |
| <i>ORAI2:chr7_102096952</i>  |                           | <i>ADAR1</i>             | 505 | -0.0412 | 0.0175 | 0.0188   |
|                              | ADARs gene expression     | <i>ADAR2</i>             | 505 | 0.0101  | 0.0225 | 0.654    |
|                              |                           | <i>ADAR3</i>             | 505 | 0.146   | 0.0588 | 0.0132   |
|                              | Target gene expression    | <i>ORAI2</i>             | 505 | 0.254   | 0.0334 | 1.43E-13 |
|                              | Target isoform expression | <i>ENST00000356387.2</i> | 526 | 2.43    | 0.221  | 2.04E-25 |
|                              | Target protein expression | Protein                  | 78  | NA      | NA     | NA       |
| <i>MCUR1:chr6_13788361</i>   |                           | <i>ADAR1</i>             | 505 | 0.0568  | 0.0163 | 0.000555 |
|                              | ADARs gene expression     | <i>ADAR2</i>             | 505 | -0.0426 | 0.0211 | 0.0438   |
|                              |                           | <i>ADAR3</i>             | 505 | 0.11    | 0.0554 | 0.0468   |
|                              | Target gene expression    | <i>MCUR1</i>             | 505 | 0.0663  | 0.0197 | 0.000823 |
|                              | Target isoform expression | <i>ENST00000379170.3</i> | 526 | 1.22    | 0.216  | 2.40E-08 |
|                              | Target protein expression | <i>MCUR1_Q96AQ8</i>      | 78  | -0.08   | 0.04   | 0.05     |
| <i>HSDL2:chr9_115237504</i>  |                           | <i>ADAR1</i>             | 505 | -0.043  | 0.0189 | 0.0233   |
|                              | ADARs gene expression     | <i>ADAR2</i>             | 505 | -0.126  | 0.0237 | 1.67E-07 |
|                              |                           | <i>ADAR3</i>             | 505 | 0.175   | 0.0635 | 0.00594  |
|                              | Target gene expression    | <i>HSDL2</i>             | 505 | 0.201   | 0.0367 | 6.81E-08 |
|                              | Target isoform expression | <i>ENST00000398803.1</i> | 526 | 1.25    | 0.305  | 4.93E-05 |
|                              | Target protein expression | <i>HSDL2_Q6YN16</i>      | 78  | -0.04   | 0.03   | 0.13     |
| <i>GPRC5B:chr16_19876365</i> |                           | <i>ADAR1</i>             | 505 | -0.0318 | 0.0167 | 0.0573   |
|                              | ADARs gene expression     | <i>ADAR2</i>             | 505 | -0.0568 | 0.0213 | 0.00792  |
|                              |                           | <i>ADAR3</i>             | 505 | 0.233   | 0.0555 | 3.26E-05 |
|                              | Target gene expression    | <i>GPRC5B</i>            | 505 | 0.155   | 0.0438 | 0.000422 |
|                              | Target isoform expression | <i>ENST00000300571.2</i> | 526 | 17.8    | 3.62   | 1.16E-06 |
|                              | Target protein expression | <i>GPRC5B.Q9NZH0.2</i>   | 78  | 0.16    | 0.08   | 0.05     |

Associations in STAGE I unpaired ROSMAP DLPFC samples before and after adjustment of the neuron proportion or total reads

| Gene: top RNA editing | Outcome | Unadjusted<br><i>P</i> | Adjusted neuron transcription<br>module |               |          | Adjusted total reads |               |          |
|-----------------------|---------|------------------------|-----------------------------------------|---------------|----------|----------------------|---------------|----------|
|                       |         |                        | N                                       | BETA (STDERR) | <i>P</i> | N                    | BETA (STDERR) | <i>P</i> |

|                                  |                                   |          |     |                |          |     |                      |          |
|----------------------------------|-----------------------------------|----------|-----|----------------|----------|-----|----------------------|----------|
| <i>SYT11:chr1_155851645</i>      | AD status in all <sup>#</sup>     | 2.09E-05 | 493 | 1.21 (0.36)    | 7.05E-04 | 614 | 1.34 (0.32)          | 3.27E-05 |
| <i>MCUR1:chr6_13788361</i>       |                                   | 1.36E-04 | 493 | 2.29 (0.69)    | 9.99E-04 | 614 | 2.21 (0.60)          | 2.32E-04 |
| <i>SOD2:chr6_13788361</i>        |                                   | 2.75E-05 | 493 | 1.12 (0.35)    | 1.24E-03 | 614 | 1.31 (0.31)          | 3.30E-05 |
| <i>ORAI2:chr7_102096952</i>      |                                   | 4.64E-06 | 493 | 2.49 (0.71)    | 4.90E-04 | 614 | 3.02 (0.63)          | 2.07E-06 |
| <i>HSDL2:chr9_115237504</i>      |                                   | 1.25E-04 | 493 | 4.81 (1.49)    | 1.38E-03 | 614 | 0.52 (0.01)          | 1.01E-04 |
| <i>PFKP:chr10_3168677</i>        |                                   | 7.54E-04 | 493 | 4.39 (1.65)    | 8.04E-03 | 614 | 0.48 (0.01)          | 9.38E-04 |
| <i>GPRC5B:chr16_19876365</i>     | AD status in females <sup>#</sup> | 2.68E-06 | 306 | 5.45 (1.42)    | 1.48E-04 | 392 | 0.57 (0.01)          | 2.40E-06 |
| <i>ORAI2:chr7_102096952</i>      | PHFtau in all*                    | 4.72E-08 | 500 | 0.11 (0.03)    | 3.66E-05 | 622 | 0.13 (0.02)          | 8.07E-08 |
| <i>KCNIP2:chr10_103596067</i>    |                                   | 6.72E-07 | 500 | 0.06 (0.01)    | 1.10E-05 | 622 | 0.07 (0.01)          | 1.08E-06 |
| <i>GPRC5B:chr16_19874115</i>     |                                   | 5.54E-07 | 500 | 0.12 (0.03)    | 1.14E-04 | 622 | 0.15 (0.03)          | 6.59E-07 |
| <i>YPEL1:chr22_22078228</i>      |                                   | 1.77E-07 | 500 | 0.17 (0.03)    | 1.03E-06 | 622 | 0.18 (0.03)          | 9.39E-08 |
| <i>AC174470.1:chr17_79780692</i> | $\beta$ -amyloid in all*          | 9.38E-07 | 500 | -0.08 (0.02)   | 2.23E-04 | 622 | -0.09 (0.02)         | 8.51E-07 |
| <i>ORAI2:chr7_102096952</i>      | Neuritic plaque burden in all*    | 8.47E-07 | 505 | 0.008 (0.002)  | 1.59E-05 | 628 | 8.37E-03 (1.61E-04)  | 2.97E-07 |
| <i>CABP1:chr12_121078907</i>     |                                   | 2.74E-07 | 505 | -0.009 (0.002) | 2.08E-05 | 628 | -9.34E-03 (1.84E-04) | 5.41E-07 |
| <i>AC174470.1:chr17_79780692</i> | Cognition decline*                | 5.76E-07 | 481 | 0.002 (6E-04)  | 1.82E-03 | 593 | 2.35E-03 (4.7E-04)   | 7.44E-07 |
| <i>MUM1:chr19_1371887</i>        |                                   | 8.50E-07 | 481 | -7E-04 (1E-04) | 9.95E-06 | 593 | -6.88E-04 (1.37E-04) | 6.65E-07 |

172 #Top RNA editing events associated with AD risk in Stage I and II genome-wide analysis in all subjects and female only (Stage II meta-P  $\leq 1.2 \times 10^{-6}$ ). Stage I  
173 dataset include ROSMAP unpaired samples of dorsolateral prefrontal cortex (DLPFC), and the Stage II datasets include samples from Stage I and BM44 of  
174 MSBB study (MSBB\_BM44), temporal cortex (TCX) of MAYO study (MAYO\_TCX), and DLPFC samples of independent set of subjects participating in the  
175 ROSMAP multi-region study (ROSMAP multi-region DLPFC). BETA, STDERR, and P represent the regression coefficient, standard error and corresponding P  
176 values of the generalized linear model of RNA editing level (% alternative read) as the dependent variable and clinical AD status (0, 1, and 2 represent normal  
177 controls, mild cognitive impairment (MCI), and AD patients) as exposure variable, and covariates include sex, age at death, postmortem interval (PMI), RIN,  
178 experimental batch, study (in 2 of the ROSMAP DLPFC datasets), race (in MSBB BM44 dataset), and tissue source (in MAYO temporal cortex dataset). The  
179 direction column in Stage II showed the sign of the BETA from each included dataset in the order of ROSMAP unpaired DLPFC, MSBB\_BM44, MAYO\_TCX,  
180 and ROSMAP multi-region DLPFC. The displayed P values were not adjusted by the multiple testings and were derived by two-sided tests.

181 \* BETA, STDERR, and P represent the regression coefficient, standard error and corresponding P values of the generalized linear model of RNA editing level  
182 (% alternative allele for analysis of expressions of gene and isoforms and continuous outcome of AD neuropathological traits) or RNA editing status (alternative  
183 allele is present or not for protein analysis) as the exposure and each of the trait (expression levels of genes, isoforms and proteins) as the outcomes with the  
184 adjustment of covariates of age at death, sex, RIN, postmortem interval, study (ROS or MAP) and experimental batches. The expression of genes were  
185 represented by log<sub>2</sub> of FPKM, the expression of isoforms were represented by FPKM, and the protein expressions were represented by the log<sub>2</sub>-transformed ratio  
186 (over the pooled standard following normalization). The displayed P values were not adjusted by the multiple testings and were derived by two-sided tests.  
187  
188  
189

190 Table S5. Association of *ORAI2* editing event (chr7:102096952, hg19) on multiple traits in ROSMAP unpaired DLPFC dataset  
 191 (N=635).

| Associations with multiple AD-related traits |     |       |        |          |
|----------------------------------------------|-----|-------|--------|----------|
| Traits                                       | N   | BETA  | STDERR | <i>P</i> |
| PHFtau*                                      | 500 | 12.90 | 2.33   | 4.72E-08 |
| β-amyloid*                                   | 500 | 4.16  | 1.22   | 7.31E-04 |
| Neuritic<br>plaque<br>burden*                | 505 | 0.79  | 0.16   | 8.47E-07 |
| Cognition<br>decline*                        | 481 | -0.14 | 0.03   | 3.07E-06 |
| Clinical AD<br>status <sup>#</sup>           | 620 | 0.03  | 0.01   | 4.64E-06 |

192  
 193 \*The BETA, STDERR, and *P* represent the regression coefficient and its corresponding standard error and *P* values for the exposure  
 194 variable of *ORAI2* editing level (% alternative reads) in the generalized linear model with dependent variable of each trait and  
 195 covariates of age at death, sex, RIN score, postmortem interval, study (ROS or MAP) and experimental batches. The displayed *P*  
 196 values were not adjusted by the multiple testings and were derived by two-sided tests.

197 <sup>#</sup>The BETA, STDERR, and *P* represent the regression coefficient and its corresponding standard error and *P* values the general linear  
 198 model of RNA editing level (% alternative read) as the dependent variable and clinical AD status (0, 1, and 2 represent normal  
 199 controls, mild cognitive impairment (MCI), and AD patients) as exposure variable, and covariates include sex, age at death,  
 200 postmortem interval, RIN, experimental batch, and study (ROS or MAP). The displayed *P* values were not adjusted by the multiple  
 201 testings and were derived by two-sided tests.

202 Abbreviation: PHFtau, abnormally phosphorylated Tau protein, AT8.; Cog. dec., global cognitive decline (longitudinal).

203

204 Table S6. Comparisons between AD genes and non-AD genes.

| Types        | Genes                                                                              | N of RNA editing events | BETA (minimum to maximum) | P values (minimum to maximum) |
|--------------|------------------------------------------------------------------------------------|-------------------------|---------------------------|-------------------------------|
| Non-AD genes | *                                                                                  | 40,692                  | -5.250E-04 to 5.587E-04   | 1.9638E-11 to 1               |
| AD genes     | CACNA2D3, CELF1, CLU, MEF2C, PICALM, PILRA                                         | 113                     | -0.00016 to 3.65E-04      | 0.01 to 0.99                  |
|              | APOE,CR1,BIN1,INPP5D,FBXL7,CD2AP,HLA-DRB5, HLA-DRB1,EPHA1,NME8,ZCWPW1,NYAP1,PTK2B, | 0                       |                           |                               |
|              | ECHDC3,SPI1,MS4A2,MS4A6A,SORL1,SLC24A4,RIN3,                                       | 0                       |                           |                               |
|              | FERMT2,ACE,DSG2,ABCA7,CD33,HMHA1,GRIN3B,CASS4                                      | 0                       |                           |                               |

205 The primary analysis was conducted within each of the 10 dataset, and a general linear model (glm) was utilized to analyze the  
 206 associations between RNA editing levels (% alternative reads) and AD status (0, 1, and 2 represent normal controls, mild cognitive  
 207 impairment (MCI), and AD patients). we conducted the meta-analysis on the largest cohort including samples from each study of:  
 208 ROSMAP unpaired DLPFC, the DLPFC dataset of the paired ROSMAP multi-region RNA-seq project, BM44 dataset of the paired  
 209 MSBB RNA-seq project, and the temporal cortex dataset of the paired MAYO RNA-seq project. The beta estimates and standard  
 210 errors from each dataset were meta-analyzed using an inverse variance-weighted, fixed-effects approach implemented in METAL.  
 211 The displayed P values were not adjusted by the multiple testings and were derived by two-sided tests.

212 REFERENCES

- 213 1. Allen M, *et al.* Human whole genome genotype and transcriptome data for Alzheimer's and  
214 other neurodegenerative diseases. *Sci Data* **3**, 160089 (2016).
- 215 2. De Jager PL, *et al.* A multi-omic atlas of the human frontal cortex for aging and Alzheimer's  
216 disease research. *Sci Data* **5**, 180142 (2018).
- 217 3. Wang M, *et al.* The Mount Sinai cohort of large-scale genomic, transcriptomic and proteomic  
218 data in Alzheimer's disease. *Sci Data* **5**, 180185 (2018).
- 219 4. Allen M, *et al.* Conserved brain myelination networks are altered in Alzheimer's and other  
220 neurodegenerative diseases. *Alzheimers Dement* **14**, 352-366 (2018).
- 221 5. Allen M, *et al.* Divergent brain gene expression patterns associate with distinct cell-specific tau  
222 neuropathology traits in progressive supranuclear palsy. *Acta Neuropathol* **136**, 709-727 (2018).
- 223 6. Li B, Dewey CN. RSEM: accurate transcript quantification from RNA-Seq data with or without a  
224 reference genome. *BMC Bioinformatics* **12**, 323 (2011).
- 225 7. Dobin A, *et al.* STAR: ultrafast universal RNA-seq aligner. *Bioinformatics* **29**, 15-21 (2013).
- 226 8. Tan MH, *et al.* Dynamic landscape and regulation of RNA editing in mammals. *Nature* **550**, 249-  
227 254 (2017).
- 228 9. Mertins P, *et al.* Reproducible workflow for multiplexed deep-scale proteome and  
229 phosphoproteome analysis of tumor tissues by liquid chromatography-mass spectrometry. *Nat*  
230 *Protoc* **13**, 1632-1661 (2018).
- 231 10. Mertins P, *et al.* Reproducible workflow for multiplexed deep-scale proteome and  
232 phosphoproteome analysis of tumor tissues by liquid chromatography-mass spectrometry.  
233 *Nat Protoc* **13**, 1632-1661 (2018).

- 234 11. Wingo TS, *et al.* Integrating Next-Generation Genomic Sequencing and Mass Spectrometry To  
235 Estimate Allele-Specific Protein Abundance in Human Brain. *J Proteome Res* **16**, 3336-3347  
236 (2017).
- 237 12. Tukey JW. *Exploratory Data Analysis*. Addison-Wesley (1977).
- 238 13. McKenzie AT, *et al.* Multiscale network modeling of oligodendrocytes reveals molecular  
239 components of myelin dysregulation in Alzheimer's disease. *Molecular Neurodegeneration* **12**,  
240 82 (2017).
- 241 14. Callister SJ, *et al.* Normalization approaches for removing systematic biases associated with  
242 mass spectrometry and label-free proteomics. *J Proteome Res* **5**, 277-286 (2006).
- 243
- 244
