# Supplementary material for: Atlas of RNA editing events affecting protein expression in aged and Alzheimer’s disease human brain tissue
Source: PubMed Central journal article supplement (PMC8640037; doi:10.1038/s41467-021-27204-9), 2021-12-02
Supplement: 41467_2021_27204_MOESM2_ESM.pdf [file 41467_2021_27204_MOESM2_ESM.pdf]

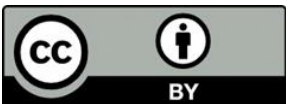

**Open Access** This file is licensed under a Creative Commons Attribution 4.0 International License, which permits use, sharing, adaptation, distribution and reproduction in any medium or format, as long as you give appropriate credit to the original author(s) and the source, provide a link to the Creative Commons license, and indicate if changes were made. In the cases where the authors are anonymous, such as is the case for the reports of anonymous peer reviewers, author attribution should be to 'Anonymous Referee' followed by a clear attribution to the source work. The images or other third party material in this file are included in the article's Creative Commons license, unless indicated otherwise in a credit line to the material. If material is not included in the article's Creative Commons license and your intended use is not permitted by statutory regulation or exceeds the permitted use, you will need to obtain permission directly from the copyright holder. To view a copy of this license, visit <http://creativecommons.org/licenses/by/4.0/>.

## Reviewers' Comments:

### Reviewer #1:

#### Remarks to the Author:

In the manuscript "RNA editing in the aging and Alzheimer brain: transcriptomic and proteomic perspectives", Ma et al. have conducted a large-scale genome-wide study to identify RNA editing events across several brain regions and over 1,000 individuals from different cohorts of AD patients and controls. Furthermore, by producing proteomic data that partially matched with the transcriptomic analysis, the authors could assess the presence of aminoacidic changes of the RNA editing events in coding regions.

There is great need for understanding the molecular mechanisms involved in the pathogenesis of AD and this study could identify RNA editing events located in the 3'UTR regions of two protein-coding genes associated with AD dementia. Furthermore, association of editing events in some mitochondrial-related genes with AD supports the long-standing hypothesis of mitochondrial dysfunction in AD patients.

However, the manuscript needs to be improved as there are multiple aspects that are not tackled or investigated only at a superficial level and that, if dealt with greater detail, might improve the overall quality of the manuscript. Specifically, role of RNA editing events at non-coding transcripts and overlap with SNPs associated with AD need to be investigated as they might unveil potentially interesting candidates. Furthermore, some claims need to be experimentally validated. I think the paper would be appropriate for publication in Nature Communications if the following aspects are addressed:

#### Major points:

1. Although a partial strength of the study is the availability of proteomic data to compare the effect of RNA editing events at protein level, I would urge the authors to look also at RNA editing events found in non-coding RNAs. There is already substantial literature in the field that identifies the involvement of lncRNAs in the AD pathogenesis. On the top of my mind I can think at BACE1-AS, a lncRNA that enhances the cleavage of APP by beta secretase and, in turn, production of A $\beta$  peptide. Also, RNA editing events located in lncRNA genes have been already suggested to alter stability, structure and/or function of the transcript.

Therefore, I think a more thorough study that includes also analyses on the association of RNA editing events at non-coding regions with AD is needed to improve the quality of the manuscript.

2. Can authors provide some analyses regarding the overlap of RNA editing events and SNP already associated with AD? Probably multiple thresholds for the distance between the editing event and the associated SNP need to be taken into consideration. This is potentially extremely interesting as it could shed some light on the functional outcome of polymorphisms previously associated with AD.

3. Current hypotheses regarding the genetic architecture of common diseases envision contribution of both common and rare variants to disease pathogenesis. How about the role of more rare editing events in AD? I think it would be of great interest to lower the threshold from 10% to 5% and/or 1% and perform the analyses again. I would expect more rare editing variants to have a higher penetrance and, in turn, stronger functional impact on the target transcript.

4. The possibility envisioned by the authors that ORAI2 editing may be involved in accumulation of tau pathology needs to be experimentally validated. The authors need to provide a more solid evidence supporting the claim that editing events may cause a change in the cell calcium homeostasis.

Minor:

- The authors identified RNA editing events located in MUM1 locus associated with aging-related cognitive decline. MUM1 is also known as interferon regulated factor 4 (IRF4). Can the authors speculate a bit in the discussion what might be the relevance of this association taking into consideration the role of inflammation in the aging brain?

- It would be important for the authors to provide a definition of the acronym of difference cohorts in the main text and not just in the Methods section. I find this omission particularly confusing for the authorship.

- I recommend the authors to consider the reorganization of Figure 2 as in the main text Figure 2c is mentioned before Figure 2b.

Reviewer #2:

Remarks to the Author:

In this article, the authors have attempted to characterize the global RNA-editing changes associated with AD brain. The authors have used previously published AMP-AD data including their own ROSMAP data and computed RNA editing sites across the brain and then performed associations of those brain-specific RNA-editing events to clinical AD status, AD pathologies and cognitive decline. The authors also used tangential proteomics data in another dataset to validate some of the RNA editing events. While the idea of this project is really great and interesting, the implementation is lack-luster. It seems that the authors wanted to publish this as soon as possible without spending time analyzing the data in-depth. Several shortcomings of the paper -

a) Why was association of differential editing sites with gene/transcript-level expression not explored in this study?

b) Why was the association of differential editing sites with tangential datasets generated by this group like TWAS, GWAS genes, haQTLs, mQTL, Speakeasy clusters, differential-splicing, etc not explored? Much of these tangential datasets were generated by DeJager lab itself in previous papers. Such comparison will give great insights into AD biology.

c) It is well known that number of editing sites is highly correlated with sequencing depth (see Tran et al., Nat Neuosci, 2018). Do the authors see similar correlation and what do they do as different AD cohorts (ROSMAP, MSBB, Mayo) have very different sequencing depths .

d) Can the authors compare the brain-specific RNA-editing sites from published datasets?

e) Why only A-I editing was used. Though A-I editing is the most common, interesting changes could be in other editing sites, given that it is relatively straightforward to analyze the data for that.

f) Is there change in average editing levels with progression of AD, it is unclear from the analysis.

g) In any analysis, p-values directly depend on sample size. Since the authors have hundreds of samples, it is unsurprising that the p-values they report are significant. Moreover, the p-value levels do not imply biological feasibility. The authors should change the figures (like Fig 5C) to report fold-change, beta-values and not signed log<sub>10</sub> p-values (corrected or not)

h) Why was an aligner like RASER (Ahn et al., Bioinformatics, 2015) not used instead of GATK recommended STAR. Aligners like RASER are especially tuned for quantifying RNA-editing sites with more precision.

i) It is unclear what steps were taken to ensure that the RNA editing site resulted from a sequence error. The description in the methods section "Quality Control of RNA editing events" does not go into detail regarding any posterior filters which were used to remove RNA editing sites that were probably caused by technical artifacts in sequencing or read mapping. More details in the methods section are needed.

Reviewer #3:

Remarks to the Author:

In this paper, Ma et al describe an innovative and interesting integration of multi-level omic data to report on RNA edited mRNA variants and their relation to peptides in Alzheimer's Disease. This is an enormously well powered study of some of the most detailed tissue collections, and is the first paper of this kind I have seen in the Alzheimer's field. The proteins it highlights are certainly reasonable functional candidates for a role in AD pathophysiology, but I find the technical approach to integration more interesting than the links to AD! I do have some questions as to how the integration was done, but because this is a novel field I think these questions can be addressed with a more technical discussion and some small scale extra analyses, as opposed to new data gathering.

Major points

1) My largest point of interest comes from the non-synonymous ('recoded') variant detection in the mass-spectrometry. Given that the outcomes being modelled come from percentages of reference variant vs edited variant, it would be great to talk a little bit about changes in sequence changing the observability of an individual peptide. A single amino acid change can change retention time and will change m/z – in extreme cases may even put the peptide into a different fraction. How can this be controlled for? Is the gold standard a smaller replication experiment with labelled standards? This would be a great addition to the discussion where it states that most of the recording events were not observed at the protein level – is this biological or could at least some of it be technical?

2) In a similar vein, I would like to see some discussion as to how a lack of observation in MS doesn't necessarily indicate an absence of a peptide – there may be interference with the edited form or a new modification that makes it difficult to observe.

3) I would also like to see some discussion of the way the reference was designed for spectra to peptide matching. I can think of multiple ways to do this and all ways have their advantages and disadvantages. It looks from the materials and methods like extra peptides that contained the edited variant were added to a standard reference. Was consideration made to the presence of other common variants (such as non-synonymous SNPs) in these peptides? For this reason I like the idea of using a personalized RNA-seq derived reference for each sample, but this likely leads to issues of normalization across samples, and greatly increases computing power and analysis time. Collapsing all variants into one single reference likely decreases the number of confidently identified peptides. So, no perfect approach, but would love to hear a little more justification in the text as to exactly how this method was decided on and whether any trials of other method were used to arrive there.

Minor points

1) What about this study enabled the detection of so many new variants? Is it just the increased power from the large number of samples?

2) Is the method of thresholding for calling variants by RNA only now a field accepted method? If so, a reference should be included in results (there is one in the methods). If not, it would be great to take a handful of case from ROSMAP that also have DNA-seq and show that the variants are genuine for the ones that came out as being of strong interest.

3) The distribution of editing events in some of the plots in Fig 4 looks to be bimodal. Is there any relationship to RNA quality / technical effects that produces this bimodality?

4) What is known about RNA edited mRNAs – do they all make it out of the nucleus? I'm looking at the hugely increased number of calls in the CBE and simply wondering if that is a function of the densely packed nuclei there? So there are more unprocessed nuclear mRNAs sampled in that region than the others?

5) Could the biological and technical factors adjusted for in the linear models on page 8 be listed in the results section rather than the methods?

6) For protein level quantification of variant harboring proteins (page 10), was the peptide containing the variant removed from overall protein level quant? Leaving it in may affect the overall protein quant. (If it doesn't, it would be great to show that in a supplement).

68 **Reviewer(s)' Comments to Author:**

69 **Reviewer #1:**

70 **Comments to the Author:**

71 *In the manuscript "RNA editing in the aging and Alzheimer brain: transcriptomic and proteomic*  
72 *perspectives", Ma et al. have conducted a large-scale genome-wide study to identify RNA*  
73 *editing events across several brain regions and over 1,000 individuals from different cohorts of*  
74 *AD patients and controls. Furthermore, by producing proteomic data that partially matched with*  
75 *the transcriptomic analysis, the authors could assess the presence of amino acidic changes of*  
76 *the RNA editing events in coding regions.*

77

78 *There is great need for understanding the molecular mechanisms involved in the pathogenesis*  
79 *of AD and this study could identify RNA editing events located in the 3'UTR regions of two*  
80 *protein-coding genes associated with AD dementia. Furthermore, association of editing events*  
81 *in some mitochondrial-related genes with AD supports the long-standing hypothesis of*  
82 *mitochondrial dysfunction in AD patients.*

83

84 *However, the manuscript needs to be improved as there are multiple aspects that are not*  
85 *tackled or investigated only at a superficial level and that, if dealt with greater detail, might*  
86 *improve the overall quality of the manuscript. Specifically, role of RNA editing events at non-*  
87 *coding transcripts and overlap with SNPs associated with AD need to be investigated as they*  
88 *might unveil potentially interesting candidates. Furthermore, some claims need to be*  
89 *experimentally validated. I think the paper would be appropriate for publication in Nature*  
90 *Communications if the following aspects are addressed:*

91

92

93 *Major points:*

94

95 *1. Although a partial strength of the study is the availability of proteomic data to compare the*  
96 *effect of RNA editing events at protein level, I would urge the authors to look also at RNA editing*  
97 *events found in non-coding RNAs. There is already substantial literature in the field that*  
98 *identifies the involvement of lncRNAs in the AD pathogenesis. On the top of my mind I can think*  
99 *at BACE1-AS, a lncRNA that enhances the cleavage of APP by beta secretase and, in turn,*  
100 *production of A $\beta$  peptide. Also, RNA editing events located in lncRNA genes have been already*  
101 *suggested to alter stability, structure and/or function of the transcript.*

102 *Therefore, I think a more thorough study that includes also analyses on the association of RNA*  
103 *editing events at non-coding regions with AD is needed to improve the quality of the*  
104 *manuscript.*

105 **Authors' response:**

106 Thank you for this comment. RNA editing events that occur in lncRNA were included in the  
107 analysis, although we did not specifically discuss them. Out of the total of 112,779 editing  
108 events, there are 17,216 ones located within non-coding RNAs. We also have included a more  
109 thorough analysis that includes the function and AD associations between the non-coding and  
110 re-coding RNA editing events. As described above (page 2) in the response to the editor, we  
111 have made major revision to the manuscript by adding the genome-wide association analysis of  
112 the expressions of genes, isoforms, and proteins. In brief, the re-coding RNA editing events  
113 have weaker effects than the non-coding ones on the expressions of genes and isoforms. In  
114 terms of the AD associations, the manhattan plot (Fig. 5a) showed the results for both types of  
115 RNA editing events (non-coding and re-coding). All the six RNA editing events which passed the  
116 genome-wide significance threshold are the non-coding ones although the density plot of the *P*

117 values for these two types of editing events are similar. In Fig. 5c, we were showing the AD  
118 associations for the 13 novel peptide sequences (from 10 re-coding events) existed in the 171  
119 ROSMAP subjects with both RNA-seq data and proteomic profiles where the majority have the  
120 same direction of the effect on AD on the level of RNA and protein but only 2 peptides reached  
121 nominal significance ( $P < 0.05$ ) not the genome-wide significance threshold.

122

123 *2. Can authors provide some analyses regarding the overlap of RNA editing events and SNP*  
124 *already associated with AD? Probably multiple thresholds for the distance between the editing*  
125 *event and the associated SNP need to be taken into consideration. This is potentially extremely*  
126 *interesting as it could shed some light on the functional outcome of polymorphisms previously*  
127 *associated with AD.*

128 **Authors' response:**

129 Thank you for suggesting this analysis. We have made a review of all the genome-wide  
130 significant AD loci reported by the AD genetics community; however, there is no overlap with the  
131 six top AD-associated genes that we report. Furthermore, we have intentionally removed those  
132 events if they are overlapping with DNA variation, i.e. single nucleotide polymorphism (SNP),  
133 since we need to get the true RNA editing events which occur at the level of RNA not DNA.  
134 Further, we have added one analysis to compare the AD associations between those RNA  
135 editing events located on the genes reported to be related to AD or not. We have presented the  
136 result in the Table S5 where we found 113 RNA editing events are located within the AD  
137 relevant genes but their significance to AD is weaker than those editing events in the genes not  
138 reported to be related to AD by the genetic studies. Finally, we have added one statement into  
139 the first paragraph of the Discussion section that "Our list of top genes associated with AD does  
140 not overlap with that from the genetic studies of AD, and none of the RNA editing events located  
141 in the AD relevant genes reported by the genetic studies reached genome-wide significance  
142 threshold (Table S6), suggesting that changes in RNA editing in AD are unlikely to be related to  
143 genetic risk factors or to affect the same targets." (Page 13 and line 287 of the manuscript).

144

145 *3. Current hypotheses regarding the genetic architecture of common diseases envision*  
146 *contribution of both common and rare variants to disease pathogenesis. How about the role of*  
147 *more rare editing events in AD? I think it would be of great interest to lower the threshold from*  
148 *10% to 5% and/or 1% and perform the analyses again. I would expect more rare editing variants*  
149 *to have a higher penetrance and, in turn, stronger functional impact on the target transcript.*

150 **Authors' response:**

151 This is an interesting question that we considered carefully. In this first report, we elected to  
152 focus on more common editing events for several reasons. First, we were concerned about the  
153 quality of those rare RNA editing events. This is indicated by our proteomic validation for the re-  
154 coding events called based on the RNA-seq datasets. We have an important advantage in that  
155 171 of the unpaired ROSMAP subjects have both RNA-seq data and TMT proteomic data from  
156 the same brain region. However, 99% (244 out of 247) of the rare (frequency < 10%) re-coding  
157 events do not have evidence of being translated: almost none of these predicted peptides are  
158 observed in the TMT data, while that percentage for the frequent re-coding events (frequency >  
159 10%) is 87%. We stated in the Discussion section (page 17 line 375 of the manuscript file) that  
160 "Finally, we elected not to comment on the role of infrequent editing events (frequency <10%)  
161 as these are more likely to include sequencing errors." In addition, our sample size is not  
162 appropriate to provide robust findings for low frequency events (maximum number is 635 while  
163 the minimum number is 68). We utilized a meta-analysis approach for the AD associations  
164 where the summary statistics from each study were derived at first. In this case, the minimum  
165 sample size of 68 is not sufficient to provide a robust result for the RNA editing event with a  
166 frequency <10% since the number of subjects carrying the editing event will be smaller than 5.

167 That said, there are probably interesting low-frequency events to characterize in more detail, but  
168 this will require a dedicated effort and larger replication sample sets.

169  
170 *4. The possibility envisioned by the authors that ORAI2 editing may be involved in accumulation*  
171 *of tau pathology needs to be experimentally validated. The authors need to provide a more solid*  
172 *evidence supporting the claim that editing events may cause a change in the cell calcium*  
173 *homeostasis.*

174 **Authors' response:**

175 Thank you for proposing the experimental validation which is very interesting but beyond the  
176 scope of the manuscript. We stated in the Conclusion section that "Our findings need to be  
177 replicated and validated in the future experiments with model systems." (Page 17 and line 384  
178 of the manuscript). We respectfully disagree with the reviewer when she or he indicates that the  
179 validated experiment can provide a more solid evidence. Solid evidence has to be grounded in  
180 rigorous statistical analyses that produce robust, reproducible results. This was the goal of our  
181 manuscript, and we accomplished it, laying an important, robust foundation for future work.  
182 Experimental manipulation can be an important manner with which to further explore a solid  
183 observation from human tissue, but it is prone to all of the limitations of model systems,  
184 especially in this case where we are analyzing human cortical tissue in which multiple cell types  
185 are interacting *in vivo*. As we have emphasized in our conclusion section, our study is focused  
186 on an association analysis with the advantage of observing the associations present in the  
187 primary human tissues from free living individuals, and our association results provide  
188 suggestions with which to guide future mechanistic studies which can be conducted in human  
189 cell lines. However, a negative result from such *in vitro* analyses would be uninterpretable since  
190 there is no evidence to expect that the same chromatin conformation or molecular processes  
191 would be present *in vitro*, making *in vitro* experiments of limited utility at this stage: a positive  
192 result would be nice but could have occurred by chance and a negative result would not mean  
193 that the result from human cortex is incorrect. Nonetheless, we do agree that careful  
194 development of a model system would be a natural next step for our investigations.

195  
196 *Minor:*

197 *- The authors identified RNA editing events located in MUM1 locus associated with aging-*  
198 *related cognitive decline. MUM1 is also known as interferon regulated factor 4 (IRF4). Can the*  
199 *authors speculate a bit in the discussion what might be the relevance of this association taking*  
200 *into consideration the role of inflammation in the aging brain?*

201 **Authors' response:**

202 We have added a statement in the Discussion section to address this point (page 15, line 341 of  
203 the manuscript): "In addition, our finding at MUM1 (also known as interferon regulated factor 4,  
204 IRF4) is noteworthy for its association with cognitive decline. Rats with intracerebroventricular  
205 injection of  $\beta$ -amyloid resulted in cognitive impairment and imbalance between IRF4 and IRF5,  
206 which was rescued by the M2 macrophage transplantation<sup>1</sup>. An amyloid proteinopathy model  
207 has also been reported to harbor microglia with an interferon response<sup>2</sup>. However, evidence  
208 supporting a role for interferon responses in human AD has not emerged very strongly so far,  
209 although more generic anti-viral responses have been reported<sup>3</sup>. IRF4 is therefore interesting in  
210 this sense, and focuses attention on the interferon pathway in human AD."

211  
212 *- It would be important for the authors to provide a definition of the acronym of difference*  
213 *cohorts in the main text and not just in the Methods section. I find this omission particularly*  
214 *confusing for the authorship.*

215 **Authors' response:**

216 We apologize for this neglect, and we have added the definitions in the sections other than  
217 Methods.



218  
219 - I recommend the authors to consider the reorganization of Figure 2 as in the main text Figure  
220 2c is mentioned before Figure 2b.

221 **Authors' response:**

222 We have reorganized Figure 2 to follow the main manuscript.

223

224

225 **Reviewer #2:**

226 **Comments to the Author:**

227 *In this article, the authors have attempted to characterize the global RNA-editing changes*  
228 *associated with AD brain. The authors have used previously published AMP-AD data including*  
229 *their own ROSMAP data and computed RNA editing sites across the brain and then performed*  
230 *associations of those brain-specific RNA-editing events to clinical AD status, AD pathologies*  
231 *and cognitive decline. The authors also used tangential proteomics data in another dataset to*  
232 *validate some of the RNA editing events. While the idea of this project is really great and*  
233 *interesting, the implementation is lack-luster. It seems that the authors wanted to publish this as*  
234 *soon as possible without spending time analyzing the data in-depth. Several shortcomings of*  
235 *the paper -*

236

237 *a) Why was association of differential editing sites with gene/transcript-level expression not*  
238 *explored in this study?*

239 **Authors' response:**

240 Given the length of the manuscript, we initially elected not to include these analyses as we were  
241 more interested in the protein-level results and in the disease associations. However, in  
242 response to this comment, we have now added such analyses to the Fig. 4. Please see our  
243 detailed response to the editor on page 2 of this letter which addresses this comment in detail.

244

245 *b) Why was the association of differential editing sites with tangential datasets generated by this*  
246 *group like TWAS, GWAS genes, haQTLs, mQTL, Speakeasy clusters, differential-splicing, etc*  
247 *not explored? Much of these tangential datasets were generated by DeJager lab itself in*  
248 *previous papers. Such comparison will give great insights into AD biology.*

249 **Authors' response:**

250 As described above, we have added the analysis of transcriptome-wide association study  
251 (TWAS) and the proteome-wide association study (PWAS) in response to this comment. There  
252 are many potential analyses to perform given the breadth of multi-omic data that we have on  
253 these subjects. We elected to keep a clear narrative, focusing on a subset of important  
254 analyses, with other analyses deferred for later manuscripts. Assembling all of the suggested  
255 analyses into one manuscript would turn what is already a long, dense manuscript into a laundry  
256 list of results that would be difficult to digest for the reader. Since the RNA editing events belong  
257 to the post-transcriptional mechanism, we felt that it was out of the scope of the main theme of  
258 the current study to conduct the analysis with the pre-transcriptional mechanisms such as the  
259 genome-wide association study (GWAS) and the other epigenomic features of DNA methylation  
260 (mQTL) and histone modifications (haQTL). However, we have added an evaluation of the  
261 known AD loci, as described above in a response to reviewer 1 (see **page 13 line 287** in the  
262 manuscript).

263

264

265 *c) It is well known that number of editing sites is highly correlated with sequencing depth (see*

266 *Tran et al., Nat Neuosci, 2018). Do the authors see similar correlation and what do they do as*  
267 *different AD cohorts (ROSMAP, MSBB, Mayo) have very different sequencing depths .*

268 **Authors' response:**

269 We added the correlations between the number of RNA editing events and total reads into the  
270 Table S1, and they were highly correlated to each other for the most datasets. This may explain  
271 in part that the number of RNA editing events called by the MAYO cerebellum dataset was  
272 higher than the other datasets since the read depths of MAYO cerebellum dataset is higher than  
273 the others (Table S1). This is why we did not include this dataset into the meta-analysis. In  
274 addition, we did the post-hoc check of the top AD loci by further adjusting for the total reads and  
275 all the results remain significant. We added the statement into the Discussion section (page 17  
276 line 375 of the manuscript file) that "Finally, we elected not to comment on the role of infrequent  
277 editing events (frequency <10%) as these are more likely to include sequencing errors."

279 *d) Can the authors compare the brain-specific RNA-editing sites from published datasets?*

280 **Authors' response:**

281 We have added Fig. S1 which showed the tissue specificity of the known RNA editing events  
282 across different tissue types. We annotate our RNA editing events as "known" or "novel" based  
283 on the Rigorously Annotated Database of A-to-I RNA Editing (RADAR) database (version 2  
284 Human) (<http://rnaedit.com>) and GTEx publication (Tan MH., et al., Nature, 2017). According to  
285 their Supplementary File 3, there were 3,710 tissue specific RNA editing events, and 273 were  
286 also identified by us. The number one tissue type of these 273 known tissue-specific RNA  
287 editing events belong to brain (105, 38%). We have added this analysis to the Results section  
288 (page 5 line 104 of the manuscript file) that "The majority of the known editing events are  
289 specific to brains (Fig. S1)."

291 *e) Why only A-I editing was used. Though A-I editing is the most common, interesting changes*  
292 *could be in other editing sites, given that it is relatively straightforward to analyze the data for*  
293 *that.*

294 **Authors' response:**

295 The A-I editing is the most common editing type which has been well-studied to have the  
296 functions on changing the amino acid sequence or expression levels of transcripts and proteins.  
297 The other types of RNA editing might be interesting but we may not have the statistical power to  
298 conduct a robust and validated studies on them given our small sample size. This is an  
299 interesting question that can be pursued in future work.

301 *f) Is there change in average editing levels with progression of AD, it is unclear from the*  
302 *analysis.*

303 **Authors' response:**

304 The first paragraph of the Results section of "AD-associated RNA editing events" (page 8 line  
305 179 of the manuscript file) found that the expression levels of Adenosine Deaminases Acting on  
306 RNA (ADAR) were associated with the AD clinical stages. "We at first evaluated the relation of  
307 AD and the level of expression of the three ADAR genes (Fig. S3) across the 635 unpaired  
308 DLPFC ROSMAP samples. We found no change in ADAR1 expression, but there is lower  
309 expression of ADAR2 (P=0.01) and higher expression of ADAR3 in AD cases (P=0.01), while  
310 the mild cognitive impairment (MCI) subjects are in the middle and the cognitively non-impaired  
311 controls have the highest expression of ADAR2 and lowest expression of ADAR3, a potential  
312 RNA editing inhibitor<sup>4</sup>. For the composite value including all ADARs (ADAR1+ADAR2-ADAR3)  
313 as used in prior studies<sup>4</sup>, AD patients have the lowest value, while MCI subjects are in the  
314 middle and controls have the highest value (P=0.03)." Thus, some of the enzymes involved in  
315 RNA editing are modestly differentially expressed in AD, so we expected to see the average  
316 editing level to be lower in AD patients. However, this is not the case; there is no significant

317 changes in the average editing levels with AD. We have added the statement of our analysis  
318 into the Result section on page 8 line 187 that "However, we did not find evidence of  
319 association between the average editing levels of each subject with progression of AD (Data not  
320 shown)."

321

322 *g) In any analysis, p-values directly depend on sample size. Since the authors have hundreds of*  
323 *samples, it is unsurprising that the p-values they report are significant. Moreover, the p-value*  
324 *levels do not imply biological feasibility. The authors should change the figures (like Fig 5C) to*  
325 *report fold-change, beta-values and not signed log10 p-values (corrected or not)*

326 **Authors' response:**

327 We have replaced the plots with images using BETA values (**Fig. 5d**).

328

329 *h) Why was an aligner like RASER (Ahn et al., Bioinformatics, 2015) not used instead of GATK*  
330 *recommended STAR. Aligners like RASER are especially tuned for quantifying RNA-editing*  
331 *sites with more precision.*

332 **Authors' response:**

333 At the RNA editing events discovery stage, we applied the GATK based on TOPHAT2 (not  
334 START) alignment in the ROSMAP unpaired samples from 635 subjects. It was reported that  
335 the mapping precision is similar between TOPHAT 2 and PASER<sup>5</sup>. Also, a similar calling  
336 pipeline which combines GATK and BWA alignment, was utilized to call the RNA editing events  
337 across a variety of human primary tissues and the callings are validated by Sanger sequencing  
338<sup>4</sup>. Understanding the challenges of RNA editing callings from the short read RNA-seq data, we  
339 filtered out those RNA editing events with total reads less than 20, alternative reads less than 5,  
340 frequency less than 10%, and those overlapping with the DNA variants based on the whole  
341 genome sequencing data across the subjects within the same consortium. All of these filtering  
342 criteria are more stringent than the proposed posterior filtering criteria to ensure that we  
343 consider only the most robust sites<sup>6</sup>. At the replication stage, we downloaded the official version  
344 of the STAR aligned bam files which were agreed across the AMP-AD consortium from the  
345 Synapse data portal, and we only focused on those significant RNA editing events that had  
346 been called in the discovery stage.

347

348 *i) It is unclear what steps were taken to ensure that the RNA editing site resulted from a*  
349 *sequence error. The description in the methods section "Quality Control of RNA editing events"*  
350 *does not go into detail regarding any posterior filters which were used to remove RNA editing*  
351 *sites that were probably caused by technical artifacts in sequencing or read mapping. More*  
352 *details in the methods section are needed.*

353 **Authors' response:**

354 Thank you for raising this important point. We have now clarified our pre-processing filters. As  
355 we have mentioned in the above response, we applied the posterior filters to filter out those  
356 RNA editing events with (1) total reads less than 20, and (2) alternative reads less than 5, and  
357 (3) frequency less than 10%, and (4) those overlapping with the DNA variants based on the  
358 whole genome sequencing data across the subjects that were considered. Our posterior filters  
359 are considered to be more conservative compared to the recommended filters by the  
360 researchers in the RNA editing field<sup>6</sup>.

361

362

363

364

365 **Reviewer #3:**

366 **Comments to the Author:**

367 *In this paper, Ma et al describe an innovative and interesting integration of multi-level omic data*  
368 *to report on RNA edited mRNA variants and their relation to peptides in Alzheimer's Disease.*  
369 *This is an enormously well powered study of some of the most detailed tissue collections, and is*  
370 *the first paper of this kind I have seen in the Alzheimer's field. The proteins it highlights are*  
371 *certainly reasonable functional candidates for a role in AD pathophysiology, but I find the*  
372 *technical approach to integration more interesting than the links to AD! I do have some*  
373 *questions as to how the integration was done, but because this is a novel field I think these*  
374 *questions can be addressed with a more technical discussion and some small scale extra*  
375 *analyses, as opposed to new data gathering.*

376  
377 **Major points**

378  
379 *1) My largest point of interest comes from the non-synonymous ('recoded') variant detection in*  
380 *the mass-spectrometry. Given that the outcomes being modelled come from percentages of*  
381 *reference variant vs edited variant, it would be great to talk a little bit about changes in*  
382 *sequence changing the observability of an individual peptide. A single amino acid change can*  
383 *change retention time and will change m/z – in extreme cases may even put the peptide into a*  
384 *different fraction. How can this be controlled for? Is the gold standard a smaller replication*  
385 *experiment with labelled standards? This would be a great addition to the discussion where it*  
386 *states that most of the recording events were not observed at the protein level – is this*  
387 *biological or could at least some of it be technical?*

388 **Authors' response:**

389 The reviewer raises an insightful and important point in that technical factors play a large role in  
390 hindering observation of non-canonical variant peptides including ones resulting from RNA  
391 editing. Not only are retention time and m/z changed by a single residue substitution, but also  
392 ionization efficiency, affecting differential quantitation. For this reason, given the relative  
393 quantitation peptide data we have, it is not possible to calculate edited/total abundance, where  
394 summing total abundance from edited and unedited peptides is not correct due to differential  
395 ionization efficiency of the distinct peptides. The ROSMAP TMT data is from mixtures of TMT  
396 multiplexes (batches) and averages the precursor signal from 8 distinct samples in each  
397 multiplex mixture of peptides, further diminishing the chance of sequencing peptides occurring  
398 at a low frequency in the sample population. Further, independent offline prefractionation of  
399 each TMT multiplex batch of peptides (N=45 batches used for our analysis here) can lead to  
400 batch effects, which, when extreme, lead to missing quantitation in batches. Fortunately, when  
401 quantitation is available, batch effects can be addressed, and we have done this in our analysis  
402 using robust median polish of ratio with global internal standard signal within batch and across  
403 batches (Johnson ECB, et al, Nat Med, 2020). Thus, we are benefitting from normalization to  
404 internal standard comprised of the equal mixture of all analyzed homogenates, present twice in  
405 each batch. Relative abundance as a ratio of sample TMT reporter abundance divided by that  
406 for the same peptide from internal standard is free of effects due to differential ionization, but  
407 comparison of relative abundance ratios is only possible across samples and not across  
408 different peptides, since division of sample peptide abundance by the internal standard peptide  
409 abundance abrogates different magnitudes of the signal for different peptides. As the reviewer  
410 points out, only a calibration curve to obtain absolute quantification, e.g., with known amounts of  
411 heavy stable isotope-labeled peptide for each edited and unedited peptide counterpart, spiked-  
412 in to each sample before fractionation would allow precise calculation of the comparable values  
413 for both counterpart peptides and of the percent edited of total. We have added these technical

414 explanations into the Method section (page 22 line 494 of the manuscript file) that "Given the  
415 relative quantitation peptide data we have, it is not possible to calculate edited/total abundance,  
416 where summing total abundance from edited and unedited peptides is not correct due to  
417 differential ionization efficiency of the distinct peptides. So, we calculated the value of  
418 edited/non-edited ratio because relative abundance as a ratio of sample TMT reporter  
419 abundance divided by that for the same peptide from internal standard is free of effects due to  
420 differential ionization, whereas comparison of relative abundance ratios is only possible across  
421 samples and not across different peptides, since division of sample peptide abundance by the  
422 internal standard peptide abundance abrogates different magnitudes of the signal for different  
423 peptides."

424  
425 *2) In a similar vein, I would like to see some discussion as to how a lack of observation in MS  
426 doesn't necessarily indicate an absence of a peptide – there may be interference with the edited  
427 form or a new modification that makes it difficult to observe.*

428 **Authors' response:**

429 Indeed, it follows from the above listed technical factors hindering complete quantification and  
430 identification across samples and subject to ion suppression and interference, that there is a  
431 possibility of no identification of a peptide present in the highly complex input peptide mixture for  
432 total brain proteome. We now address this comment by explicitly stating that absence of  
433 evidence for a peptide in mass spectrometry does not allow the inference or an interpretation  
434 that such a result is evidence of absence. Please check the highlighted added text in the  
435 Discussion section of the paragraph of limitations on page 16 line 366 of the manuscript file that  
436 "Furthermore, the mass spectrometry based proteomic methodologies have technical factors  
437 which hinder the complete quantification and identification across samples, and they are subject  
438 to ion suppression and interference such that that there is a possibility of no identification of a  
439 peptide present in the highly complex input peptide mixture for total brain proteome. This is  
440 consistent with the idea that absence of evidence for a peptide in mass spectrometry does not  
441 allow the inference or an interpretation that such a result is evidence of absence of that peptide  
442 in the cortex."

443  
444 *3) I would also like to see some discussion of the way the reference was designed for spectra to  
445 peptide matching. I can think of multiple ways to do this and all ways have their advantages and  
446 disadvantages. It looks from the materials and methods like extra peptides that contained the  
447 edited variant were added to a standard reference. Was consideration made to the presence of  
448 other common variants (such as non-synonymous SNPs) in these peptides? For this reason I  
449 like the idea of using a personalized RNA-seq derived reference for each sample, but this likely  
450 leads to issues of normalization across samples, and greatly increases computing power and  
451 analysis time. Collapsing all variants into one single reference likely decreases the number of  
452 confidently identified peptides. So, no perfect approach, but would love to hear a little more  
453 justification in the text as to exactly how this method was decided on and whether any trials of  
454 other method were used to arrive there.*

455 **Authors' response:**

456 The reviewer brings up an important point about combinatorial variation that was partially  
457 addressed by experiment and reference database design. 17,112 separate full-length protein  
458 entries with all possible combinations of non-synonymous RNA editing events were generated  
459 by in silico translation. Thus, if two edits fall within the same tryptic peptide, they would be  
460 detectable by our approach. However, we did not consider other sources of protein sequence  
461 variation such as SNPs in DNA. Therefore, peptides from translation of edited RNA that also  
462 contains a SNP leading to a coding change would be missed. SNPs are specific to the  
463 individual's proteome being analyzed, so that, to detect them, a personalized database  
464 incorporating all SNPs, if not also indels, would be necessary. The issues with the approach,

465 have been well described and partially addressed for non-multiplexed (label-free) sample LC-  
466 MS/MS raw data with available paired whole exome sequencing (Wingo et al, J Proteome Res,  
467 2017). Namely, with many variants to incorporate into a personal database, the database size  
468 grows and this hampers sensitivity of confident identification of all peptides due to false  
469 discovery control needing to consider more decoy peptides. The process is also much more  
470 computationally demanding, as a separate database search is performed for every set of raw  
471 data for each individual. This perspective is now incorporated into the text on page 17 line 372  
472 of the manuscript file that "And, the reference proteomic database of 17,112 peptide sequences  
473 incorporated the situation when multiple RNA editing events happen at the same time but not  
474 including the considerations of the genetic variation, as such an inclusion would inflate false  
475 discovery due to increasing numbers of decoy peptides and a more intense computational  
476 requirement <sup>7</sup>."

477

478 *Minor points*

479

480 *1) What about this study enabled the detection of so many new variants? Is it just the increased*  
481 *power from the large number of samples?*

482 **Authors' response:**

483 According to advances in the RNA editing field, the number and the percentage of the novel  
484 editing events we have identified is not that different from other studies. With 1,865 samples  
485 across 9 brain regions from 1,074 independent subjects, "we have identified 112,779 frequent  
486 RNA editing events (frequency  $\geq 10\%$ ), and 58,761 (52%) of them are novel (Fig. 2a)" (page 5  
487 line 100 of the manuscript). Our total number of 112,799 is only a quarter of the total number of  
488 RNA editing events identified in the previous study with 8,551 samples from 53 body sites of the  
489 552 independent subjects (total number = 408,580) (Tan. MH, et al., Nature, 2017). Also, based  
490 on the previously reported 408,580 RNA editing events by Tan et al., we calculated the  
491 percentage of novel ones which were not reported by them. As a result, we found that 52% of  
492 our 112,779 events (58,761) were not reported by the previous study. But on the perspective of  
493 the previous study, 86% of their 408,580 (349,819) events were not reported by us. It may be  
494 possible that larger number of samples simply provide increase power to detect more RNA  
495 editing events. For example, the number of RNA editing events identified with the 635 ROSMAP  
496 unpaired dorsolateral prefrontal cortex (DLPFC) is greater than that with the 68 ROSMAP  
497 DLPFC paired samples. Also, the MAYO cerebellum (CBE) dataset has significantly greater  
498 number of the RNA editing events than the other datasets, which is in line with our findings that  
499 "the MAYO CBE dataset has a significantly greater number of total reads, aligned reads,  
500 uniquely aligned reads, % of ribosome bases and greater median 3' bias than the other  
501 datasets." (page 5 line 109 of the manuscript file). However, it is also obvious that the  
502 "increased power by larger number of samples" cannot fully explain the issue we have seen.  
503 We speculate that multiple factors may also have contributions, including the inter-subject  
504 variation, tissue-specificity, and brain region-specificity. Our study focused on the brain samples  
505 while the previous one collected samples from 53 sites across the body. Our additional analysis  
506 suggested that the RNA editing sites we have reported are enriched in brain specific sites  
507 reported by the previous study and we have added a statement in the Results section on page 5  
508 line 104 of the manuscript file that "The majority of the known editing events are specific to brain  
509 tissues (Fig. S1)". The finding that brain-specific editing is different from that in non-brain  
510 regions was also reported and highlighted by the previous study. In terms of the brain region  
511 specificity, we as well as Tan. MH reported the segregated RNA editing patterns of the  
512 cerebellum compare to the other brain regions. Please check our response to your later  
513 comment about this issue (page 13 of this response letter).

514

515 *2) Is the method of thresholding for calling variants by RNA only now a field accepted method?*

516 *If so, a reference should be included in results (there is one in the methods). If not, it would be*  
517 *great to take a handful of case from ROSMAP that also have DNA-seq and show that the*  
518 *variants are genuine for the ones that came out as being of strong interest.*

519 **Authors' response:**

520 Thank you for pointing this out. Considering the duplicated message, we have removed the  
521 statement about thresholding from the Results section. In addition, we have described this in  
522 more details in the Method section (page 20 line 447 of the manuscript file). Our method of the  
523 thresholding (total reads  $\geq 20$  and edited reads  $\geq 5$ ) for calling variants by RNA is more  
524 conservative than the recommended filters (Li et al., RNA, 2013) (total reads  $\geq 5$  and edited  
525 reads  $\geq 2$ ). In addition, we used the whole genome sequence (a.k.a. DNA-seq) to filter out those  
526 variants on the DNA level. Please check our detailed description in the Method section (page 20  
527 line 448 of the manuscript file): "We have applied posterior filters to filter out those RNA editing  
528 events with (1) total reads less than 20, and (2) alternative reads less than 5, and (3) frequency  
529 less than 10%, and (4) those overlapping with the DNA variants based on the whole genome  
530 sequencing data across the subjects within ROSMAP, MSBB, and MAYO, where some subjects  
531 do not have the RNA-seq data to be involved in the study."

532

533 *3) The distribution of editing events in some of the plots in Fig 4 looks to be bimodal. Is there*  
534 *any relationship to RNA quality / technical effects that produces this bimodality?*

535 **Authors' response:**

536 We are assuming you are referring the violin plots in the Fig.3 (the Fig. 4 in the previous  
537 version), where we respectfully disagree with the noteworthy issue of the bimodal distributions.  
538 Only 2 out of the total 9 datasets seem to have bimodal distributions (paired ROSMAP DLPFC  
539 and MSBB BM44). We do not think the RNA quality or technical factors are the reason for these  
540 distributions since these are paired samples which means that there are multiple samples from  
541 the same subjects which were processed with the same protocol, at the same time, and by the  
542 same technician. In addition, all of the raw RNA-seq datasets for all 9 datasets were processed  
543 by the same methodologies as described in the Method section and the same quality control  
544 pipeline was applied to all the datasets. In other words, if the RNA quality or the technical  
545 effects were the major reason for the differences, then we should have seen the bimodal  
546 distributions for all the 9 datasets not only 2.

547 In addition, actually, the violin plots in Fig.3 shows the distributions of the subject-level not the  
548 editing event-level data. We have added more detailed descriptions into the Method section "(1)  
549 Regional comparisons of RNA editing events" (page 24 line 532 of the manuscript file), these  
550 violin plots showed "the distribution of the individual-based overall level of all the called frequent  
551 RNA editing events across brain regions within the same study, which was calculated by  
552 dividing the sum of the % edited reads for all of the RNA editing events by the number of editing  
553 events called within that individual".

554

555 *4) What is known about RNA edited mRNAs – do they all make it out of the nucleus? I'm looking*  
556 *at the hugely increased number of calls in the CBE and simply wondering if that is a function of*  
557 *the densely packed nuclei there? So there are more unprocessed nuclear mRNAs sampled in*  
558 *that region than the others?*

559 **Authors' response:**

560 Thank you for suggesting that the more densely packed granule cell nuclei in the cerebellum  
561 compared to the other brain regions might act as a potential reason why the MAYO cerebellum  
562 (CBE) dataset has outstandingly greater number of RNA editing events called than the other  
563 datasets. Actually, a previous study also noted a different pattern of RNA editing in the  
564 cerebellum compared to the other brain regions (Tan et al., Nature, 2017). Although RNA  
565 editing can occur in the cell nucleus and cytosol and also within mitochondria, we did observe a  
566 trend that more subjects and more total reads may provide higher probabilities to detect RNA

567 editing events, which has been discussed in our response to your above comments (page 12  
568 line 481 of this response letter). We show the major picard metrics in the Table S1, where the  
569 MAYO CBE dataset had a significantly greater number of total reads, aligned reads, uniquely  
570 aligned reads, % of ribosome bases and greater median 3' bias than the other datasets. It is  
571 possible that these differences may be due to the fact that cerebellum has more densely packed  
572 nuclei than the other brain regions. However, we do not have the resources to provide solid  
573 evidence for this speculation. We have added more detailed descriptions of the findings in the  
574 Table S1 and highlighted the MAYO CBE dataset on page 5 line 107 of the manuscript file that  
575 "We analyzed the regional differences within each dataset separately because of their  
576 heterogeneities in RNA-seq metrics (Table S1) where the MAYO CBE dataset had a  
577 significantly greater number of greater number of total reads, aligned reads, uniquely aligned  
578 reads, % of ribosome bases and greater median 3' bias than the other datasets."

580 5) *Could the biological and technical factors adjusted for in the linear models on page 8 be listed*  
581 *in the results section rather than the methods?*

582 **Authors' response:**

583 Please check our revised text on page 6 line 127 of the manuscript file that "We conducted  
584 linear mixed models to identify those editing events with a statistically significant difference in  
585 editing levels between 2 brain regions within each study after adjusting for biological (age at  
586 death, sex) and technical confounding factors (postmortem interval and RIN score)."

587  
588 6) *For protein level quantification of variant harboring proteins (page 10), was the peptide*  
589 *containing the variant removed from overall protein level quant. Leaving it in may affect the*  
590 *overall protein quant. (If it doesn't, it would be great to show that in a supplement).*

591 **Authors' response:**

592 No, protein-level quantitation came from the standard Uniprot reference database entries and it  
593 does not incorporate the peptide quantitation of edited variant peptides, which match only to  
594 parts of the 17,112 non-Uniprot protein entries in our custom database. However, in the bottom-  
595 up paradigm of protein assembly and quantitation, for proteins that do have an edited  
596 counterpart, there is a contribution to the signal from the identical peptides of the edited protein.  
597 I.e., variant harboring proteins are quantified by peptides shared with the edited proteoform, so  
598 quantification of total protein is influenced by the presence of edited protein. It is also possible  
599 that some proteins from the custom part of our database were only identified by peptides shared  
600 with standard database entries and chosen randomly to represent the assembled protein from  
601 these peptides, in which case, quantification also represents relative total protein abundance of  
602 unedited RNA-derived protein with an unknown percent contribution from any edited RNA-  
603 derived proteoform that was missed in the database search. To clarify this point, we now state  
604 on page 23 line 502 of the manuscript file that "The protein-level quantitation came from the  
605 standard Uniprot reference database entries and it does not incorporate the peptide quantitation  
606 of edited variant peptides, which match only to parts of the 17,112 non-Uniprot protein entries in  
607 our custom database".

608

609

610 **References:**

- 611 1. Zhu, D. *et al.* M2 Macrophage Transplantation Ameliorates Cognitive Dysfunction in Amyloid-  
612 beta-Treated Rats Through Regulation of Microglial Polarization. *J Alzheimers Dis* **52**, 483-95  
613 (2016).  
614 2. Mathys, H. *et al.* Temporal Tracking of Microglia Activation in Neurodegeneration at Single-Cell  
615 Resolution. *Cell Rep* **21**, 366-380 (2017).



- 616 3. Readhead, B. *et al.* Multiscale Analysis of Independent Alzheimer's Cohorts Finds Disruption of  
617 Molecular, Genetic, and Clinical Networks by Human Herpesvirus. *Neuron* **99**, 64-82 e7 (2018).
- 618 4. Tan, M.H. *et al.* Dynamic landscape and regulation of RNA editing in mammals. *Nature* **550**, 249-  
619 254 (2017).
- 620 5. Ahn, J. & Xiao, X. RASER: reads aligner for SNPs and editing sites of RNA. *Bioinformatics* **31**,  
621 3906-13 (2015).
- 622 6. Lee, J.H., Ang, J.K. & Xiao, X. Analysis and design of RNA sequencing experiments for identifying  
623 RNA editing and other single-nucleotide variants. *RNA* **19**, 725-32 (2013).
- 624 7. Wingo, T.S. *et al.* Integrating Next-Generation Genomic Sequencing and Mass Spectrometry To  
625 Estimate Allele-Specific Protein Abundance in Human Brain. *J Proteome Res* **16**, 3336-3347  
626 (2017).
- 627

Reviewers' Comments:

Reviewer #1:

Remarks to the Author:

The revised manuscript from Ma et al addresses some of the points raised in the first round of reviews. Although I overall applaud the effort that has gone into this revised version, the manuscript contains still important shortcomings as illustrated below.

1) I appreciate the new analyses that the authors have included to try and dissect the relevance of RNA editing events at gene, transcript and protein level. However, the results described here would be more valuable for the readership of Nature Communications if additional analyses were provided. Specifically, the authors mention that non-coding RNA events have stronger effect than re-coding events on the expression levels of genes and transcripts. Can the authors provide a more detailed analyses of the relationship between location of non-coding RNA editing events (i.e. 5' and 3' UTR regions, intronic transcribed regions) and downstream effects? Is there a general pattern that can be highlighted from such rich datasets? How different RNA editing events impact on the gene and transcript levels, are they generally increased or decreased?

2) This reviewer is not convinced at all by the dismissal of the authors regarding the need for orthogonal validation of statistical associations. It is not clear to me how a statistical association can translate into functional evidence of the role of ORAI2 editing in the accumulation of PHFTau. As for start, the authors do not have any evidence that RNA editing events occurring on ORAI transcript affect the protein level. Although I understand the importance of the statistical analyses supporting a model where perturbation in RNA editing could contribute to the accumulation of Tau pathology, I argue that the model needs to be tested with an orthogonal approach in order to substantiate the claims reported in the manuscript.

Reviewer #2:

Remarks to the Author:

While the authors have done some revision work, it is disappointing that they did not performed analysis on other editing sites, except A-I. I strongly disagree that they do not have statistical power to detect additional changes in editing. I think they are leaving data/analysis on the table which could have been easily done, a recent paper (Tran et al., Nat Neuro, 2018) used far fewer samples (in Autism) and were able to still show robust changes in editing sites in addition to A-I sites.

Since the authors have multi-omic data from the same samples, eg mRNA-expression, splicing changes, RNA-editing, proteomic changes, etc it would be good to know if these changes are occurring in the same patients or not. For example, are those samples/patients showing differential RNA-editing changes same to those showing say differential splicing changes. I think it may be intriguing to know if all these molecular changes are occurring in same AD samples or different samples. They can use PCA analysis to gain insights into this aspect.

Reviewer #3:

Remarks to the Author:

I thank the Authors for their careful consideration of my questions in the initial review. I am satisfied with their responses. This is a novel field and I think getting papers out like this one, which will begin discussions on how to handle these kind of integrative analyses in such rich datasets, is important.

Becky Carlyle, Ph.D.

Instructor in Neurology, Massachusetts General Hospital

## REVIEWER COMMENTS

Reviewer #1 (Remarks to the Author):

The revised manuscript from Ma et al addresses some of the points raised in the first round of reviews. Although I overall applaud the effort that has gone into this revised version, the manuscript contains still important shortcomings as illustrated below.

1) I appreciate the new analyses that the authors have included to try and dissect the relevance of RNA editing events at gene, transcript and protein level. However, the results described here would be more valuable for the readership of Nature Communications if additional analyses were provided. Specifically, the authors mention that non-coding RNA events have stronger effect than re-coding events on the expression levels of genes and transcripts. Can the authors provide a more detailed analyses of the relationship between location of non-coding RNA editing events (i.e. 5' and 3' UTR regions, intronic transcribed regions) and downstream effects? Is there a general pattern that can be highlighted from such rich datasets? How different RNA editing events impact on the gene and transcript levels, are they generally increased or decreased?

### **Authors' response:**

Following your suggestion, we have conducted a more detailed analyses of the relationship between locations of the non-coding RNA editing events and downstream effects. We have added a panel of pie charts to **Figure 4** where we include a pie for each type of non-coding RNA editing events: those located within 5' UTR (upper left pie), exons (upper right pie), 3' UTR (lower left pie) and introns (lower right pie). The positive effects were shown in a grade from pink (non-significance,  $P > 0.05$ ) to brown (nominal-significance, Bonferroni-corrected genome-wide significance  $< P \leq 0.05$ ) to red (genome-wide significance,  $P \leq$  Bonferroni-corrected genome-wide significance) while the negative effects were shown in a grade from light green (non-significance,  $P > 0.05$ ) to green (nominal-significance, Bonferroni-corrected genome-wide significance  $< P \leq 0.05$ ) to dark green (non-significance,  $P > 0.05$ ).

We also added descriptions of these results to the Result section on page 7 line 159 that "A more detailed analyses of the non-coding events located within different genomic regions showed that the cis-effects on the expression of the isoforms and proteins were similar. But on the level of the cis-effects on the expression of the gene mRNA, the intronic non-coding editing events have less nominally significant effects compared to those events located in the 5'UTR, exons and 3'UTR (Fig. 4a-c right) where the general patterns of the effect directions /were positive rather than negative, indicating that the presence of the non-coding RNA editing events at 5'UTR, exons and 3'UTR were more likely to increase the mRNA expressions of the genes."

2) This reviewer is not convinced at all by the dismissal of the authors regarding the need for orthogonal validation of statistical associations. It is not clear to me how a statistical association can translate into functional evidence of the role of ORAI2 editing in the accumulation of PHFTau. As for start, the authors do not have any evidence that

80 *RNA editing events occurring on ORAI2 transcript affect the protein level. Although I*  
81 *understand the importance of the statistical analyses supporting a model where*  
82 *perturbation in RNA editing could contribute to the accumulation of Tau pathology, I*  
83 *argue that the model needs to be tested with an orthogonal approach in order to*  
84 *substantiate the claims reported in the manuscript.*

85 **Authors' response:**

86 We appreciate the reviewer's opinion and have tried to address this comment further in  
87 this version of the manuscript. We note, first, that ORAI2 protein expression  
88 unfortunately is not present in our TMT protein dataset of ROSMAP subjects. Only a  
89 subset of proteins and proteoforms are present in these data (as described in detail in  
90 the original publication [Johnson ECB, Dammer EB., et al., Nat. Med., 2020  
91 May;26(5):769-780]), and the absence of ORAI2 is therefore not informative in and of  
92 itself. It does prevent us from evaluating whether ORAI2 editing affects its own protein  
93 expression. We have added a sentence to highlight this on page 11 line 237: "The  
94 protein level of ORAI2 was not available, and none of the remaining RNA editing event  
95 showed significant association with their corresponding protein levels."

96 We have added the analysis of the association between ORAI2 editing event and  
97 protein expression level of TAU, encoded by the *MAPT* gene. With only 78 subjects, we  
98 found a borderline result ( $P=0.068$ ), indicating that ORAI2 editing event might affect the  
99 protein expression level of *MAPT*, consistent with our model. Please check our added  
100 Fig. 6f and statement on page 12 line 267 that "We further found a borderline significant  
101 effect of the ORAI2 editing event on the protein expression of *MAPT* ( $P=0.068$ ) (Fig.  
102 6f)."

103 Further, we evaluated data from human induced pluripotent stem cell (iPSC) lines differentiated  
104 into neuronal cells with and without expression for *MAPT*, which we have previously shown  
105 leads to Tau phosphorylation (S.E. Sullivan, T.L. Young-Pearse, Brain Res., 2017 Feb 1;  
106 1656:98-106). The data are repurposed from an earlier study (H-U. Klein, C. McCabe, et al.,  
107 Nat. Neuroscience, 2019). Overall, nine *MAPT*-overexpressing and nine control induced  
108 neuronal cell lines were available for analysis from three separate batches. In each batch, each  
109 line was assayed in triplicate. Transcriptome-wide data were generated from each condition.  
110 Unfortunately, *ORAI2* transcripts did not meet our pre-processing parameters in these data  
111 (total reads > 20 and edited reads > 5), so we were not able to evaluate these data to address  
112 the question of whether *MAPT* overexpression caused *ORAI2* expression, which would have  
113 partially addressed the question from the reviewer. Further, this shows that iPSC-derived  
114 neurons do not express *ORAI2* at a meaningful level either at baseline or with perturbation with  
115 Tau, indicating that it is not a relevant context for *ORAI2* over-expression studies. Since we do  
116 not have corroborating evidence at this time, we have elected to remove the mediation analysis  
117 of *ORAI2* from the manuscript. The results of the statistical modeling that we presented in the  
118 previous version of the manuscript are unchanged, but exploring this question further will be  
119 pursued in future efforts.

120

121

122 *Reviewer #2 (Remarks to the Author):*

123

124 *While the authors have done some revision work, it is disappointing that they did not*  
125 *performed analysis on other editing sites, except A-I. I strongly disagree that they do not*  
126 *have statistical power to detect additional changes in editing. I think they are leaving*  
127 *data/analysis on the table which could have been easily done, a recent paper (Tran et*  
128 *al., Nat Neuro, 2018) used far fewer samples (in Autism) and were able to still show*  
129 *robust changes in editing sites in addition to A-I sites.*

130 **Authors' response:**

131 We have added the analysis for those non A-I editing events. At first, we presented the  
132 distributions of different types of editing events as stacked bars (Supplementary Fig. S1) as  
133 shown by Tran et al., Nat Neuro, 2018, and we have added a description of these results to the  
134 Result section (on page 5 line 100): "The majority of RNA editing events are the canonical A-to-I  
135 editing types, which are shown as the A-to-G and T-to-C editing types ( $\geq 90\%$ ) and the C-to-T  
136 and G-to-A types (5%). (Fig. S1).

137 In addition, we added the association analysis for those non-A-to-I editing events (Table S7);  
138 there was no significant associations between the non-A-to-I editing events and available traits,  
139 including clinical diagnosis of Alzheimer's disease, phosphorylated TAU, beta amyloid, neuritic  
140 plaque burden, and cognitive decline. We have added the following statement to the Result  
141 section on page 12 line 274: "There was no significant associations between those non-A-to-I  
142 editing events and traits that we have tested (Table S7)".

143

144 *Since the authors have multi-omic data from the same samples, eg mRNA-expression,*  
145 *splicing changes, RNA-editing, proteomic changes, etc it would be good to know if*  
146 *these changes are occurring in the same patients or not. For example, are those*  
147 *samples/patients showing differential RNA-editing changes same to those showing say*  
148 *differential splicing changes. I think it may be intriguing to know if all these molecular*  
149 *changes are occurring in same AD samples or different samples. They can use PCA*  
150 *analysis to gain insights into this aspect.*

151 **Authors' response:**

152 We have derived 7 principal components based on the top 7 RNA editing events. We  
153 added the statement in the Methodology section on page 26 line 578 that "The scaled  
154 RNA editing levels (%) (mean=0 and SD=1) of each of the top 7 AD-related RNA editing  
155 events were used to derive 7 principal components (PCs) using the R "factoextra" and  
156 "prcomp".

157 We replicated their associations with the expressions of the genes, isoforms, and  
158 proteins. We presented the results in the Fig. S7 and added the statement into the  
159 Result section (page 11 line 239): "We derived 7 principal components (PCs) from the  
160 top 7 RNA editing events related to AD. As individual editing events, these PCs were  
161 also showing significant associations with the expressions of genes, isoforms, and  
162 proteins (Fig. S7).

163

164

165 *Reviewer #3 (Remarks to the Author):*

166

167 *I thank the Authors for their careful consideration of my questions in the initial review. I*  
168 *am satisfied with their responses. This is a novel field and I think getting papers out like*  
169 *this one, which will begin discussions on how to handle these kind of integrative*  
170 *analyses in such rich datasets, is important.*

171 **Authors' response:**

172 Thank you for your acknowledgement.

173

174

Reviewers' Comments:

Reviewer #2:

Remarks to the Author:

The authors have revised the manuscript to my satisfaction, the manuscript should be accepted without further delay
